# Supplementary material for: Frameworkvs.side-chain amphidynamic behaviour in oligo-(ethylene oxide) functionalised covalent-organic frameworks
Source: Royal Society of Chemistry journal article supplement (doi:10.1039/c8cc04292f), 2018-01-01
Supplement: c8cc04292f1.pdf [file c8cc04292f1.pdf]

*Supplementary Information of*

**Framework vs. Side-chain Amphidynamic Behaviour in  
Oligo-(Ethylene Oxide) Functionalized Covalent Organic  
Frameworks**

Demetrius A. Vazquez-Molina,<sup>1</sup> Giovanna M. Pope,<sup>1</sup> Andrew A. Ezazi,<sup>1</sup> Jose L. Mendoza-Cortes,<sup>2,3,4,\*</sup> James K. Harper,<sup>1\*</sup> Fernando J. Uribe-Romo<sup>1\*</sup>

<sup>1</sup>Department of Chemistry, University of Central Florida, 4111 Libra Dr. Orlando, FL 32816.

<sup>2</sup>Department of Chemical & Biomedical Engineering, Florida A&M – Florida State University, Joint College of Engineering, 2525 Pottsdamer Street, Tallahassee, Florida, 32310, United States

<sup>3</sup>Department of Physics, Scientific Computing, Materials Science and Engineering, High Performance Materials Institute, Florida State University, Tallahassee, Florida, 32310, United States

<sup>4</sup>Condensed Matter Theory, National High Magnetic Field Laboratory (NHMFL), Florida State University, 1800 E. Paul Dirac Drive, Tallahassee, Florida, 32310, United States

**Correspondence Address**

\*Prof. Fernando J. Uribe-Romo  
Department of Chemistry  
University of Central Florida  
Physical Sciences Building Room 255  
4111 Libra Drive  
Orlando, FL 32816 (USA)  
Tel: (+1)-407-823-4876  
Fax: (+1)-407-823-2252  
Email: *fernando@ucf.edu*

\*Prof. James K. Harper  
Department of Chemistry  
University of Central Florida  
Physical Sciences Building Room 244  
4111 Libra Drive  
Orlando, FL 32816 (USA)  
Tel: (+1)-407-823-5816  
Email: *james.harper@ucf.edu*

\*Prof. Jose L. Mendoza-Cortes  
Department of Physics,  
Scientific Computing,  
Materials Science and Engineering,  
High Performance Materials Institute,  
Florida State University,  
Tallahassee, FL, 32310 (USA)  
Tel: (+1)- 850-410-6298  
Email: *mendoza@magnet.fsu.edu*

## Contents

|                                                  |     |
|--------------------------------------------------|-----|
| S1. Materials and Methods                        | S4  |
| S2. Synthetic Procedures                         | S6  |
| S3. PXRD modeling                                | S16 |
| S4. Solid-state NMR saturation recovery analysis | S20 |
| S5. Thermogravimetric analysis                   | S27 |
| S6. FT-IR                                        | S29 |
| S7. Molecular Dynamics calculations              | S32 |
| S8. Solution NMR spectra                         | S34 |
| S9. References                                   | S47 |

## Section S1. Materials and Methods.

All starting materials and solvents, unless otherwise specified, were obtained from commercial sources (Aldrich, Fisher) and used without further purification. All reactions were performed at ambient laboratory conditions, and no precautions were taken to exclude oxygen or atmospheric moisture unless otherwise specified. Anhydrous *N,N*-dimethylformamide (DMF), Dichloromethane (DCM), tetrahydrofuran (THF) were purified using a custom-built alumina-column based solvent purification system (Innovative Technology). Anhydrous Dioxane, 1,2-dichloroethane (DCE), 1,2-dichlorobenzene (DCB), and dry acetone were obtained from Aldrich (Sureseal). Triethylamine (TEA) was distilled and stored under  $N_2(g)$  from  $CaH_2$  into molecular sieves. Deuterated solvents ( $CDCl_3$  and DMSO) were obtained from Cambridge Isotope Lab. Triformylphloroglucinol (Tp) was prepared according to published procedures.<sup>S1-S4</sup>

High-resolution  $^1H$  and  $^{13}C$  nuclear magnetic resonance (NMR) spectra were collected using a Bruker AVANCE-III 400 MHz spectrometer. The chemical shifts were reported relative to the solvent residual signal. NMR data was processed using MestReNova package (v. 10.0.2). Liquid chromatography-mass spectra (LC-MS) were recorded using an agilent 6230 TOF coupled with an Agilent Zorbax SB-C18 analytical column. Fourier-transform infrared spectra were recorded using a Perkin Elmer Spectrum ONE universal FT-IR ATR. 32 scans were collected for each sample at a resolution of  $120\ 000\ cm^{-1}$  from  $4000-650\ cm^{-1}$ .

Powder X-ray diffraction measurements were performed using a Rigaku Miniflex 600 diffractometer, with  $2\theta$  Bragg-Brentano geometry, with a 300 mm goniometer diameter, and a 600 W (40 kV, 15 mA) X-ray tube source using Ni-filtered  $CuK_{\alpha}$  ( $\lambda = 1.5418\ \text{\AA}$ ) radiation, equipped with a high-resolution D/tex 250 detector,  $5.0^\circ$  incident and receiving Soller slits, a  $0.625^\circ$  divergent slit, a  $1.25^\circ$  scattering slit, and a 0.3 mm receiving slit and a Ni- $CuK_{\beta}$  filter and a antiscattering blade. Samples were measured from 2 to 30 degrees with a step size of 0.02 degrees and a scan rate of 0.5 min per step. Powder samples were prepared by dropping the powder sample on glass silicon zero-background sample holder and gently pressing the powder with a glass slide.

Microwave synthesis were performed using a CEM Discover LabMate Microwave reactor, using a IntelliVent Attenuator Assembly as the pressure device for the experiments. The vessels used for the crystallizations were the 10-mL thick walled pyrex reaction vessels. The sample vessels were placed in the open vessel attenuator with the spacer and capped with the IntelliVent attenuator for each of the runs. The microwave was set to 250 w,  $175\ ^\circ C$ , pressure set to 50 psi, and with varying times according to each COF.

Simulated PXRD patterns were calculated using the Reflex module in Materials Studio (v8.0, Biovia) from the CIF file of the respective COF retrieved from their respective publications.<sup>S5</sup>

Solid-state  $^{13}\text{C}$  nuclear magnetic resonance was measured on an Agilent DD2 500 MHz narrow-bore spectrometer with a frequency 125.6816571 MHz with an Agilent 1.6 mm T3 probe. A spectral width of 29.7 kHz was employed, and 500 complex points were collected. All spectra employed  $^1\text{H}$  decoupling at a frequency of 499.77755 MHz using SPINAL decoupling with a 3.0  $\mu\text{s}$  decoupling pulse. Samples were packed in a 1.6 mm zirconia oxide rotor.  $T_1$  value of  $^{13}\text{C}$  was measured using a saturation recovery pulse sequence with 300 saturation pulses and recovery times varying from 0.10 to 40.0 s. The spectra were acquired at a spinning speed of 15.0 kHz.

## Section S2. Synthetic Procedures.

### General Synthetic Scheme for monomers:

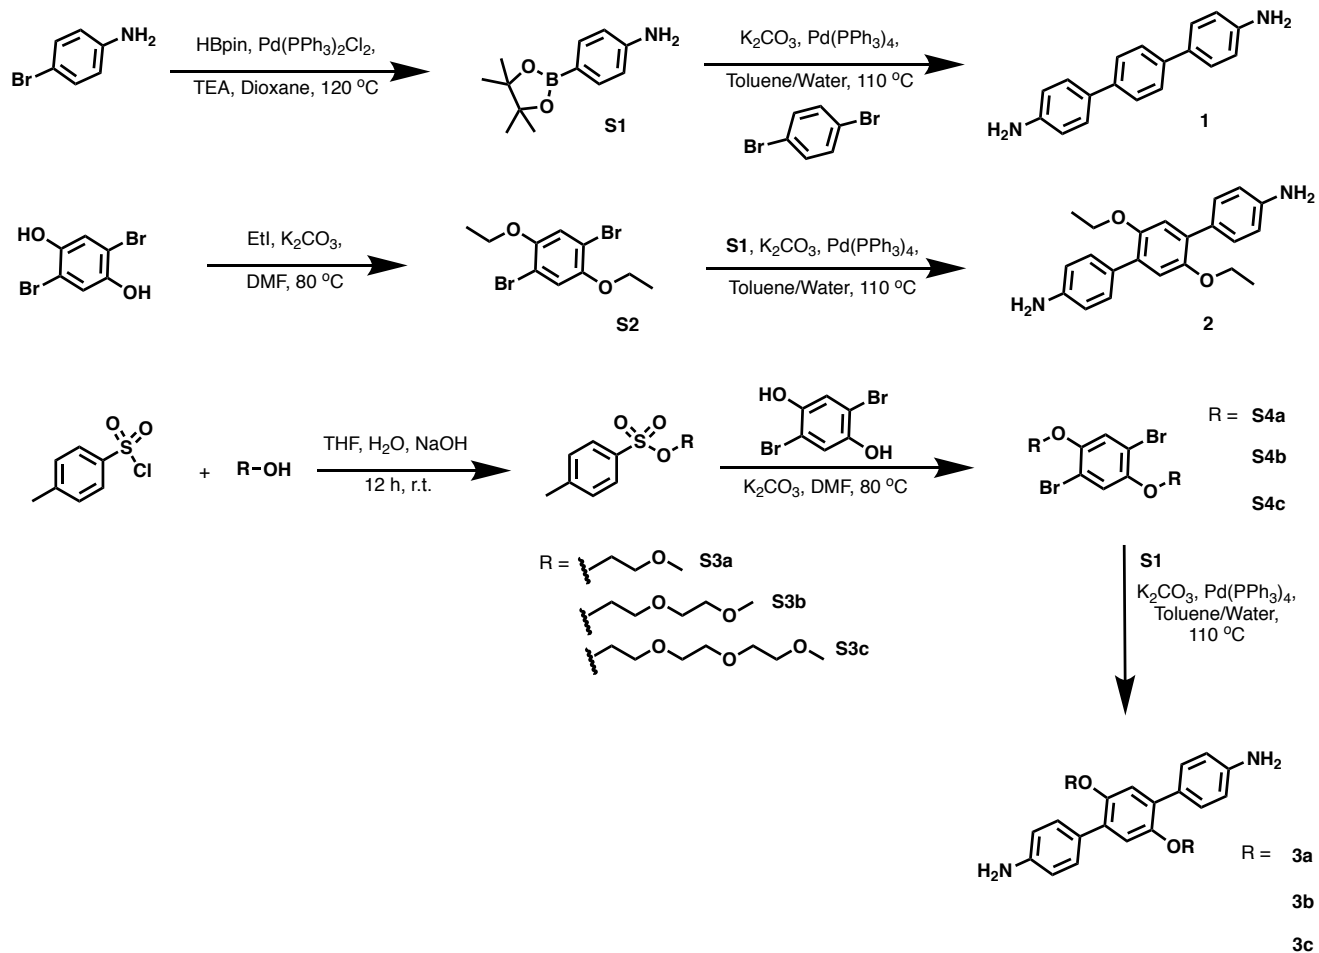

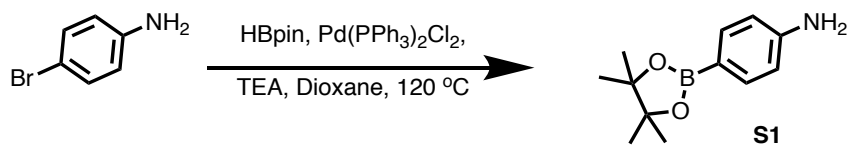

**Compound S1.** 4-bromoaniline (2.00 g, 12.0 mmol), Pd (PPh<sub>3</sub>)<sub>2</sub>Cl<sub>2</sub> (0.300 g, 1.20 mmol), triethylamine (6.5 mL, 46.5 mmol), and 1,4-dioxane (45 mL) were loaded in a 250 mL Schlenk flask loaded with a magnetic stirrer. The mixture was bubbled with N<sub>2</sub>(g) for 20 min, after which 4,4,5,5-tetramethyl-1,3,2-dioxaborolane (5.1 mL, 34.9 mmol) was added dropwise under N<sub>2</sub>(g) over the course of 10 min observing mild gas evolution. Under N<sub>2</sub>(g) flow, a water cooled condenser was attached to the top of the flask and a rubber septum and a bubbler and N<sub>2</sub>(g) inlet at the top. The reaction mixture was heated to 120 °C for 12 h followed by TLC. The reaction mixture was cooled to room temperature, quenched with water (80 mL), extracted with EtOAc (3 × 50 mL) and the combined organic extracts were rinsed with water (3 × 50 mL), brine (3 × 50 mL), dried over anhydrous Na<sub>2</sub>SO<sub>4</sub>(s) and filtered over celite. Activated charcoal (ca. 2 g) was added to the organic extract, heated to 45 °C, stirred for 15 min, and hot filtered over a plug of silica gel. Removal of the solvent at 40 °C under reduced pressure in a rotary evaporator afforded a yellow solid. Yield: 2.4 g (90%). <sup>1</sup>H NMR (400 MHz, CDCl<sub>3</sub>, 25 °C) δ 7.65 – 7.58 (d, 1H), 6.69 – 6.63 (d, 1H), 3.83 (s, 1H), 1.32 (s, 6H). <sup>13</sup>C NMR (100 MHz, CDCl<sub>3</sub>) δ 149.61, 136.76, 114.42, 83.63, 77.04, 25.20.

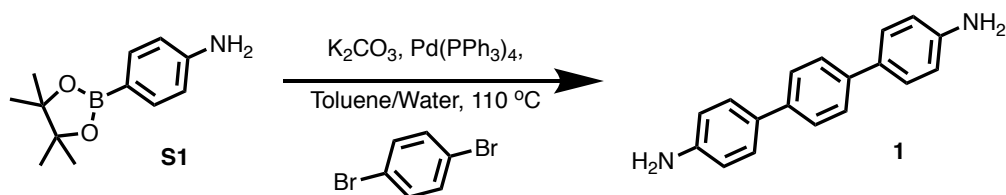

**Monomer 1.** 1,4-dibromobenzene (0.980 g, 4.15 mmol), **S1** (2.0 g, 9.13 mmol), Pd(PPh<sub>3</sub>)<sub>4</sub> (0.3 g, 0.415 mmol), K<sub>2</sub>CO<sub>3</sub> (8.6 g, 62.3 mmol), water (10 mL), toluene (10 mL) were loaded in a 50 mL Schlenk flask loaded with a magnetic stirrer. The mixture was flash frozen in liquid N<sub>2</sub>, evacuated to an internal pressure of 50 mtorr, and allowed to thaw under static vacuum. The freeze/pump/thaw procedure was repeated three more times, after which the flask was backfilled with N<sub>2</sub>(g) and under N<sub>2</sub> flow a water cooled condenser was attached with a red septum, bubbler and a positive N<sub>2</sub>(g) flow at the top. The reaction mixture was heated to 120 °C for 24 h under N<sub>2</sub>(g), tracked by TLC. The reaction mixture was cooled to room temperature, quenched with water (5 mL), extracted with EtOAc (3 × 10 mL) and the combined organic extracts were rinsed with water (3 × 10 mL), brine (3 × 10 mL), dried over anhydrous Na<sub>2</sub>SO<sub>4</sub>(s) and filtered through celite. Removal of the

solvent at 40 °C under reduced pressure in a rotary evaporator followed by column chromatography (SiO<sub>2</sub>, 45% EtOAc in hexanes) afforded a white solid. Yield: 0.560 g (52%). <sup>1</sup>H NMR (400 MHz, DMSO-*d*<sub>6</sub>) δ 7.53 (s, 1H), 7.39 – 7.35 (d, 1H), 6.66 – 6.62 (d, 1H), 5.20 (s, 1H). <sup>13</sup>C NMR (100 MHz, DMSO) δ 148.18, 137.93, 127.11, 126.82, 125.55, 114.22, 99.51, 39.52. HRMS (ESI-TOF) *m/z* calculated for C<sub>18</sub>H<sub>16</sub>N<sub>2</sub> [M+H]<sup>+</sup>: 261.1393, found 261.1355.

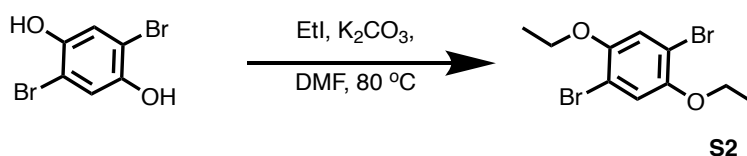

**Compound S2.** 2,5-dibromo-hydroquinone (9.0 g, 33.59 mmol), and K<sub>2</sub>CO<sub>3</sub> (27.8 g, 201.5 mmol) were loaded in a 250 mL flame dried Schlenk flask loaded with a magnetic stirrer. The flask was evacuated to a pressure of 150 mtorr and backfilled with N<sub>2</sub>(g), purge procedure three times. Anhydrous DMF (135 mL) and iodoethane (5.95 mL, 11.56 g, 73.4 mmol) were added to the flask dropwise under N<sub>2</sub>(g). The solution was stirred at room temperature for 4 h at room temperature and then heated to 80 °C with stirring for 40 h followed by TLC. The reaction was cooled to room temperature and quenched with aqueous 1 M HCl (100 mL) and stored at 4 °C for 12 h. A crystalline white solid was formed and purified by filtration using a medium porosity glass frit funnel, rinsed with cold water and dried under vacuum at room temperature. Yield 10.10 g (93%). <sup>1</sup>H NMR (400 MHz, CDCl<sub>3</sub>) δ 7.33 (s, 1H), 4.05 (q, *J* = 7.0 Hz, 2H), 1.34 – 1.28 (t, *J* = 7.0 Hz, 3H). <sup>13</sup>C NMR (100 MHz, CDCl<sub>3</sub>) δ 150.16, 118.82, 111.35, 77.16, 66.11, 14.90.

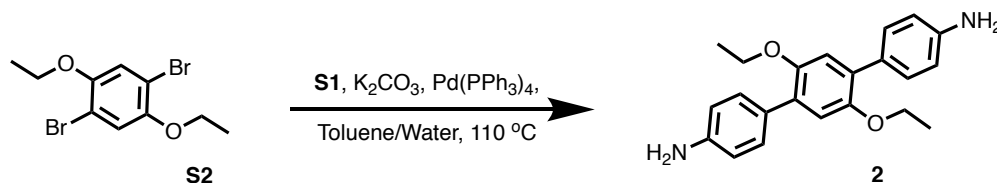

**Monomer 2.** **S2** (0.309 mmol), **S1** (0.772 mmol), Pd(PPh<sub>3</sub>)<sub>4</sub> (0.031 mmol), K<sub>2</sub>CO<sub>3</sub> (4.64 mmol), water (1 mL), toluene (1 mL) were loaded in a 50 mL Schlenk flask loaded with a magnetic stirrer. The mixture was flash frozen in liquid N<sub>2</sub>, evacuated to an internal pressure of 50 mtorr, and allowed to thaw under static vacuum. The freeze/pump/thaw procedure was repeated three more times, after which the flask was backfilled with N<sub>2</sub>(g) and under N<sub>2</sub> flow a water-cooled condenser was attached with a red septum, bubbler and a positive N<sub>2</sub>(g) flow at the top. The reaction mixture was heated to 120 °C for 24 h under N<sub>2</sub>(g), tracked by TLC. The reaction mixture was cooled to room temperature,



quenched with water (5 mL), extracted with EtOAc (3 × 10 mL) and the combined organic extracts were rinsed with water (3 × 10 mL), brine (3 × 10 mL), dried over anhydrous Na<sub>2</sub>SO<sub>4</sub>(s) and filtered through celite. Removal of the solvent at 40 °C under vacuum in a rotary evaporator followed by column chromatography (SiO<sub>2</sub>, 45% EtOAc in hexanes) afforded an off pale/white solid. Yield: 0.040 g (37%). <sup>1</sup>H NMR (400 MHz, CDCl<sub>3</sub>) δ 7.46 – 7.40 (d, 2H), 6.94 (s, 1H), 6.78 – 6.69 (d, 2H), 3.97 (q, J = 7.0 Hz, 2H), 3.71 (s, 2H), 1.31 (t, J = 7.0 Hz, 3H). <sup>13</sup>C NMR (100 MHz, DMSO) δ 149.50, 147.54, 129.67, 129.18, 125.40, 115.39, 113.39, 99.51, 73.50, 64.33, 39.52. HRMS (ESI-TOF) m/z calculated for C<sub>22</sub>H<sub>25</sub>N<sub>2</sub>O<sub>2</sub> [M+H]<sup>+</sup>: 349.1916, found 349.1893.

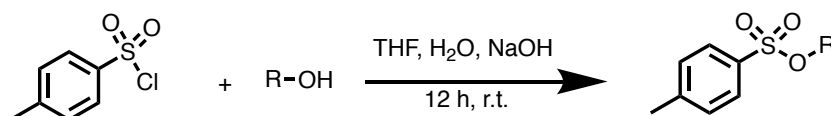

**General Procedure for S3a-c.** Three separate flasks were prepared; flask 1 was composed of p-toluenesulfonylchloride (TsCl) (237.0 mmol) dissolved in THF (74 mL), flask 2 had NaOH (367.0 mmol) dissolved in H<sub>2</sub>O (74 mL), flask 3 was composed of the alcohol (131.0 mmol) dissolved in THF (74 mL). Flask 2 and 3 were combined and then to an addition funnel flask 3 was added to it and placed over the flask 2 and 3 mixture to be added dropwise for 12h at room temperature, tracked by TLC. The reaction was quenched with water (100 mL) and extracted with DCM (2 × 60 mL) dried over anhydrous Na<sub>2</sub>SO<sub>4</sub>(s) and filtered through celite. The organic layer was reduced under pressure to afford a clear oil.

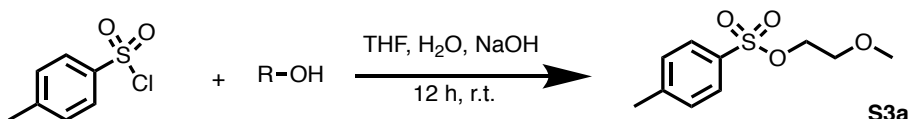

**Compound S3a.** Yield 20.08 g (87.0%). <sup>1</sup>H NMR (400 MHz, CDCl<sub>3</sub>) δ 7.82 – 7.77 (d, 1H), 7.36 – 7.31 (d, 1H), 4.17 – 4.12 (m, 1H), 3.60 – 3.53 (m, 1H), 2.44 (s, J = 0.4 Hz, 2H). <sup>13</sup>C NMR (100 MHz, CDCl<sub>3</sub>) δ 145.18, 133.32, 130.17, 128.31, 70.27, 69.42, 59.36, 22.00. HRMS (ESI-TOF) m/z calculated for C<sub>10</sub>H<sub>15</sub>O<sub>4</sub>S [M+H]<sup>+</sup>: 231.0691, found 231.0663.

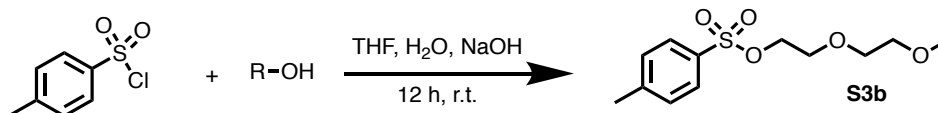

**Compound S3b.** Yield 19.08 g (84.0%). <sup>1</sup>H NMR (400 MHz, CDCl<sub>3</sub>) δ 7.82 – 7.76 (d, 1H), 7.36 – 7.31 (d, 1H), 4.19 – 4.14 (m, 1H), 3.70 – 3.65 (m, 1H), 3.59 – 3.55 (m, 1H), 3.49 –

3.44 (m, 1H), 2.44 (s,  $J = 0.3$  Hz, 2H).  $^{13}\text{C}$  NMR (100 MHz,  $\text{CDCl}_3$ )  $\delta$  145.15, 133.32, 130.15, 128.34, 72.15, 71.03, 69.57, 69.06, 59.40, 21.99. HRMS (ESI-TOF)  $m/z$  calculated for  $\text{C}_{12}\text{H}_{19}\text{O}_5\text{S}$   $[\text{M}+\text{H}]^+$ : 275.0953, found 275.0959.

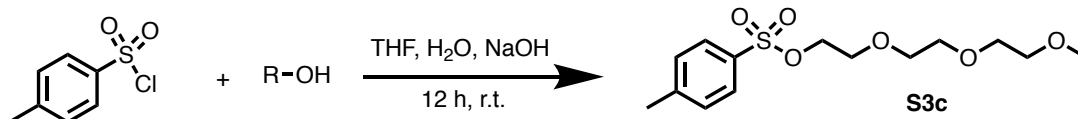

**Compound S3c.** Yield 6.50 g (33.0%).  $^1\text{H}$  NMR (400 MHz,  $\text{CDCl}_3$ - $d$ )  $\delta$  7.85 (d,  $J = 8.3$  Hz, 1H), 7.39 (d,  $J = 7.9$  Hz, 1H), 4.23 – 4.19 (m, 1H), 3.80 (t,  $J = 6.7$  Hz, 1H), 3.76 – 3.72 (m, 1H), 3.68 – 3.63 (m, 3H), 3.60 – 3.56 (m, 1H), 3.42 (s, 1H).  $^{13}\text{C}$  NMR (100 MHz,  $\text{CDCl}_3$ )  $\delta$  144.90, 133.15, 129.93, 128.10, 77.16, 72.03, 70.87, 70.69, 70.67, 69.35, 68.80, 68.10, 59.15, 25.74, 21.76. HRMS (ESI-TOF)  $m/z$  calculated for  $\text{C}_{14}\text{H}_{23}\text{O}_6\text{S}$   $[\text{M}+\text{H}]^+$ : 319.1215, found 319.1220.

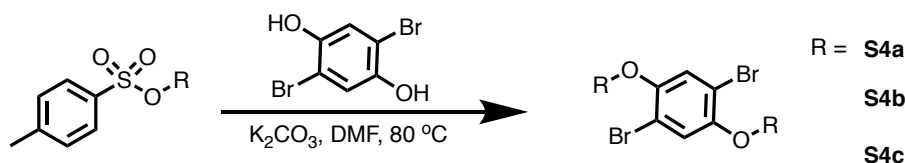

**General procedure for S4a-c.** 2,5-dibromo-hydroquinone (0.747 mmol), **S3a-c** (1.87 mmol), and  $\text{K}_2\text{CO}_3$  (4.48 mmol) were loaded in a 50 mL flame dried Schlenk flask loaded with a magnetic stirrer. The flask was evacuated to a pressure of 150 mtorr and backfilled with  $\text{N}_2(g)$ , repeating this purge procedure 3 times. Anhydrous DMF (4 mL) was added to the flask under  $\text{N}_2(g)$ . The solution was stirred and heated to 80  $^\circ\text{C}$  with stirring for 12 h and tracked by TLC. The reaction was cooled to room temperature and quenched with water (20 mL) and a precipitant was formed. A crystalline white solid was obtained and purified by filtration using a medium porosity glass frit funnel, rinsed with water and dried under vacuum.

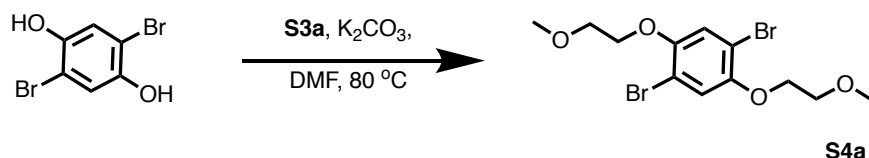

**Compound S4a.** Using **S3a**. Yield 0.280 g (89.0 %).  $^1\text{H}$  NMR (400 MHz,  $\text{CD}_3\text{CN}$ )  $\delta$  = 7.26 (s, 1H), 4.13 – 4.08 (m, 2H), 3.72 – 3.66 (m, 2H), 3.37 (s, 3H).  $^{13}\text{C}$  NMR (100 MHz,  $\text{CDCl}_3$ )  $\delta$  150.54, 119.43, 111.66, 77.16, 71.01, 70.27, 59.58.

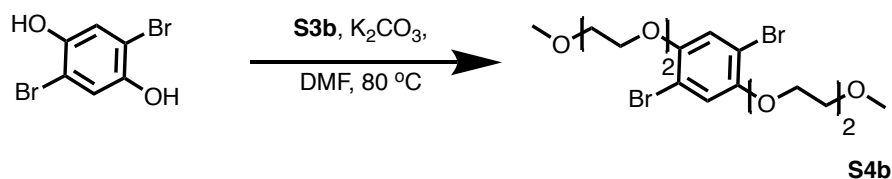

**Compound S4b.** Using **S3b**. Yield 0.240 g (60.0 %).  $^1\text{H}$  NMR (500 MHz,  $\text{CD}_3\text{CN}$ )  $\delta$  7.30 – 7.27 (s, 1H), 4.11 (td,  $J = 4.5, 2.0$  Hz, 3H), 3.78 (dtd,  $J = 5.8, 2.8, 1.2$  Hz, 2H), 3.64 (ddd,  $J = 6.1, 3.1, 1.1$  Hz, 2H), 3.51 – 3.46 (m, 2H), 3.32 – 3.28 (s, 3H).  $^{13}\text{C}$  NMR (100 MHz,  $\text{CDCl}_3$ )  $\delta$  150.46, 119.52, 119.32, 111.52, 77.16, 72.16, 71.14, 70.41, 70.38, 69.73, 59.24. HRMS (ESI-TOF)  $m/z$  calculated for  $\text{C}_{16}\text{H}_{25}\text{Br}_2\text{O}_6$   $[\text{M}+\text{H}]^+$ : 472.9997, found 472.9995.

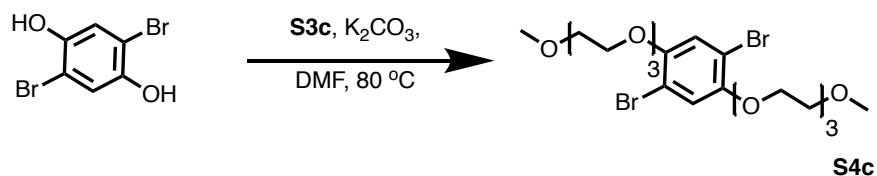

**Compound S4c.** Using **S3c**. Yield 4.9 g (70.0 %).  $^1\text{H}$  NMR (400 MHz,  $\text{CD}_3\text{CN}$ )  $\delta$  7.09 (s, 1H), 4.10 – 4.04 (m, 2H), 3.83 – 3.78 (m, 2H), 3.73 – 3.68 (m, 2H), 3.64 – 3.58 (m, 4H), 3.52 – 3.46 (m, 2H), 3.32 (s, 3H).  $^{13}\text{C}$  NMR (100 MHz,  $\text{CDCl}_3$ )  $\delta$  162.59, 150.39, 119.23, 111.44, 77.16, 72.03, 71.17, 70.81, 70.67, 70.28, 69.66, 59.12, 36.56, 31.50, 14.28. HRMS (ESI-TOF)  $m/z$  calculated for  $\text{C}_{20}\text{H}_{33}\text{Br}_2\text{O}_8$   $[\text{M}+\text{H}]^+$ : 561.0522, found 561.0519.

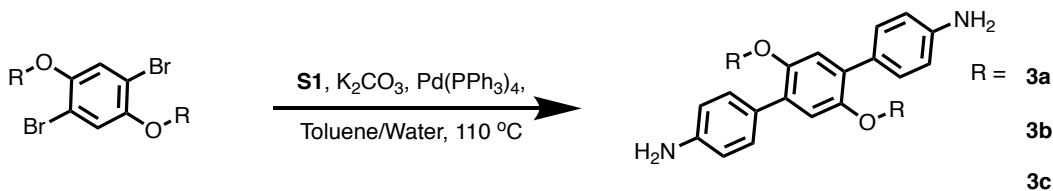

**General Procedure for 3a-c.** **S3a-c** (0.309 mmol), **S1** (0.772 mmol),  $\text{Pd}(\text{PPh}_3)_4$  (0.031 mmol),  $\text{K}_2\text{CO}_3$  (4.64 mmol), water (1 mL), toluene (1 mL) were loaded in a 50 mL Schlenk flask loaded with a magnetic stirrer. The mixture was flash frozen in liquid  $\text{N}_2$ , evacuated to an internal pressure of 50 mtorr, and allowed to thaw under static vacuum. The freeze/pump/thaw procedure was repeated three more times, after which the flask was backfilled with  $\text{N}_2(\text{g})$  and under  $\text{N}_2$  flow a water cooled condenser was attached with a red septum, bubbler and a positive  $\text{N}_2(\text{g})$  flow at the top. The reaction mixture was heated to  $120\text{ }^\circ\text{C}$  for 24 h under  $\text{N}_2(\text{g})$ , tracked by TLC. The reaction mixture was cooled to room temperature, quenched with water (5 mL), extracted with EtOAc ( $3 \times 10$  mL) and the combined organic extracts were rinsed with water ( $3 \times 10$  mL), brine ( $3 \times 10$  mL), dried

over anhydrous Na<sub>2</sub>SO<sub>4</sub>(s) and filtered through celite. Removal of the solvent at 40 °C under reduced pressure in a rotary evaporator followed by column chromatography (SiO<sub>2</sub>, 45% EtOAc in hexanes) afforded a tan solid.

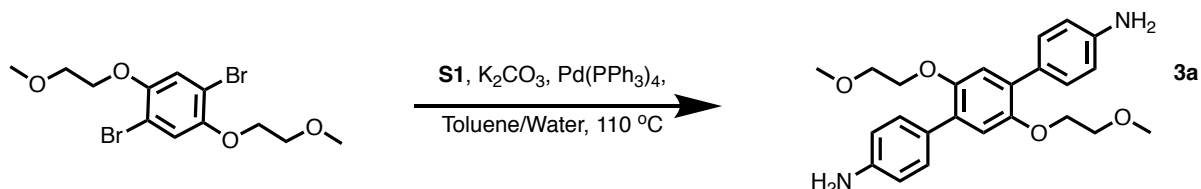

**Monomer 3a.** With **S4a** removal of the solvent at 40 °C under vacuum in a rotary evaporator followed by column chromatography (SiO<sub>2</sub>, 75% EtOAc in hexanes) afforded an off tan solid. Yield: 0.360 g (36%). <sup>1</sup>H NMR (400 MHz, DMSO-*d*<sub>6</sub>) δ 7.33 – 7.28 (m, 2H), 6.88 (s, 1H), 6.61 – 6.55 (m, 2H), 5.11 (s, 2H), 4.06 – 4.00 (m, 2H), 3.59 (dd, *J* = 3.8, 2.2 Hz, 2H), 3.27 (s, 3H). <sup>13</sup>C NMR (100 MHz, DMSO) δ 149.62, 147.60, 129.76, 129.11, 128.89, 128.19, 125.20, 115.33, 113.36, 70.68, 68.26, 58.21, 39.52. HRMS (ESI-TOF) *m/z* calculated for C<sub>24</sub>H<sub>29</sub>N<sub>2</sub>O<sub>4</sub> [M+H]<sup>+</sup>: 409.2127, found 409.2120.

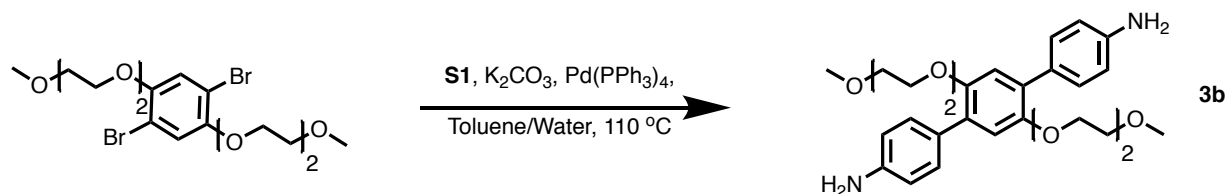

**Monomer 3b.** With **S4b** removal of the solvent at 40 °C under vacuum in a rotary evaporator followed by column chromatography (SiO<sub>2</sub>, neat EtOAc) afforded an off tan/yellow solid. Yield: 0.850 g (42%). <sup>1</sup>H NMR (400 MHz, DMSO-*d*<sub>6</sub>) δ 7.35 – 7.29 (m, 2H), 6.89 (s, 1H), 6.60 – 6.55 (m, 2H), 5.12 (s, 2H), 4.03 (dd, *J* = 5.6, 3.8 Hz, 2H), 3.69 – 3.64 (m, 2H), 3.56 – 3.52 (m, 2H), 3.45 – 3.41 (m, 2H), 3.23 (s, 3H). <sup>13</sup>C NMR (100 MHz, DMSO) δ 149.59, 147.59, 129.78, 129.07, 125.19, 115.28, 113.34, 71.32, 71.25, 69.92, 69.83, 69.70, 69.60, 69.16, 68.42, 58.09, 58.02, 40.15, 39.94, 39.73, 39.52, 39.52, 39.31, 39.10, 38.90.

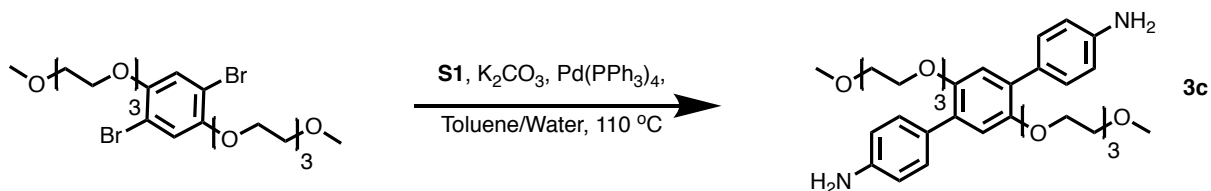

**Monomer 3c.** With **S4c** removal of the solvent at 40 °C under vacuum in a rotary evaporator followed by column chromatography (SiO<sub>2</sub>, 15% MeCN/EtOAc) afforded an off tan/brown solid. Yield: 0.600 g (18%). <sup>1</sup>H NMR (500 MHz, DMSO-*d*<sub>6</sub>) δ = 7.35 – 7.29

(d, 2H), 6.88 (s, 1H), 6.61 – 6.55 (d, 2H), 5.11 (s, 2H), 4.06 – 4.00 (m, 2H), 3.69 – 3.63 (m, 2H), 3.55 – 3.47 (m, 6H), 3.42 – 3.38 (m, 2H), 3.22 (s, 3H). <sup>13</sup>C NMR (100 MHz, DMSO) δ 149.58, 147.59, 129.78, 129.07, 125.20, 115.28, 113.34, 71.25, 69.92, 69.84, 69.60, 69.16, 68.43, 58.02, 40.15, 39.94, 39.73, 39.52, 39.31, 39.10, 38.90.

## **Synthesis of COFs:**

**TfpTP-H COF. Monomer 1** (0.020 g, 0.0714 mol) and Tfp (0.010 g, 0.0476 mol) were loaded in the microwave pyrex reaction vessel. DCE (1.5 mL) dioxane (1.5 mL), and 8 M aqueous acetic acid (100  $\mu$ L) (17:17:1 v/v/v) were added and the mixture was mixed in an ultrasonic bath for 5 min. The tube was transferred to the microwave reactor and it was operated at 250 w and 175  $^{\circ}$ C, for 10 min. An off yellow solid was obtained, filtered and rinsed with 10-15 mL of dry acetone. The filtered solid was transferred to a glass vial and immersed in dry acetone (3 mL) for 3 d, replacing the acetone each a total of nine times during this period, while storing the vial in a desiccator. The solid was filtered and activated by heating to 120  $^{\circ}$ C under high vacuum (<10 mtorr) for 12 h obtaining a yellow solid. Yield: 0.025 g (83%). Product was characterized via Powder X-Ray diffraction.

**TfpTP-OEt COF. Monomer 2** (0.025 g, 0.0714 mol) and Tfp (0.010 g, 0.0476 mol) were loaded in the microwave pyrex reaction vessel. DCE (1.5 mL) dioxane (1.5 mL), and 8 M aqueous acetic acid (100  $\mu$ L) (17:17:1 v/v/v) were added and the mixture was mixed in an ultrasonic bath for 15 min. The tube was transferred to the microwave reactor and it was operated at 250 w and 175  $^{\circ}$ C, for 15 min. An orange solid was obtained, filtered and rinsed with 10-15 mL of dry acetone. The filtered solid was transferred to a glass vial and immersed in dry acetone (3 mL) for 3 d, replacing the acetone each a total of nine times during this period, while storing the vial in a desiccator. The solid was filtered and activated by heating to 120  $^{\circ}$ C under high vacuum (<10 mtorr) for 12 h obtaining a orange solid. Yield: 0.030 g (85%). Product was characterized via Powder X-ray diffraction.

**TfpTP-OMEG COF. Monomer 3a** (0.030 g, 0.0714 mol) and Tfp (0.010 g, 0.0476 mol) were loaded in the microwave pyrex reaction vessel. DCB (1.5 mL) n-propanol (1.5 mL), and 8 M aqueous acetic acid (100  $\mu$ L) (17:17:1 v/v/v) were added and the mixture was mixed in an ultrasonic bath for 5 min. The tube was transferred to the microwave reactor and it was operated at 250 w and 175  $^{\circ}$ C, for 20 min. An off yellow solid was obtained, filtered and rinsed with 10-15 mL of dry acetone. The filtered solid was transferred to a glass vial and immersed in dry acetone (3 mL) for 3 d, replacing the acetone each a total of nine times during this period, while storing the vial in a desiccator. The solid was filtered and activated by heating to 120  $^{\circ}$ C under high vacuum (<10 mtorr) for 12 h obtaining a yellow solid. Yield: 0.030 g (75%). Product was characterized via Powder X-ray diffraction.

**TfpTP-ODEG COF. Monomer 3b** (0.040 g, 0.0714 mol) and Tfp (0.010 g, 0.0476 mol) were loaded in the microwave pyrex reaction vessel. DCB (1.5 mL) n-propanol (1.5 mL), and 8 M aqueous acetic acid (100  $\mu$ L) (17:17:1 v/v/v) were added and the mixture was mixed in an ultrasonic bath for 5 min. The tube was transferred to the microwave reactor and it was operated at 250 w and 175  $^{\circ}$ C, for 20 min. An brown solid was obtained, filtered and rinsed with 10-15 mL of dry acetone. The filtered solid was transferred to a glass vial and immersed in dry acetone (3 mL) for 3 d, replacing the acetone each a total of nine times during this period, while storing the vial in a desiccator. The solid was filtered and activated by heating to 120  $^{\circ}$ C under high vacuum (<10 mtorr) for 12 h obtaining a brown solid. Yield: 0.030 g (60%). Product was characterized via Powder X-ray diffraction.

**TfpTP-OTEG COF. Monomer 3c** (0.045 g, 0.0714 mol) and Tfp (0.010 g, 0.0476 mol) were loaded in the microwave pyrex reaction vessel. DCB (1.5 mL) n-propanol (1.5 mL), and 8 M aqueous acetic acid (100  $\mu$ L) (17:17:1 v/v/v) were added and the mixture was mixed in an ultrasonic bath for 5 min. The tube was transferred to the microwave reactor and it was operated at 250 w and 175  $^{\circ}$ C, for 20 min. A brown solid was obtained, filtered and rinsed with 10-15 mL of dry acetone. The filtered solid was transferred to a glass vial and immersed in dry acetone (3 mL) for 3 d, replacing the acetone each a total of nine times during this period, while storing the vial in a desiccator. The solid was filtered and activated by heating to 120  $^{\circ}$ C under high vacuum (<10 mtorr) for 12 h obtaining a brown solid. Yield: 0.023 g (41%). Product was characterized via Powder X-ray diffraction.

### Section S3. PXRD models

Table S1. Space group and unit cell parameters

| COF        | Space group | a (Å)   | c (Å)  |
|------------|-------------|---------|--------|
| TfpTP-H    | <i>P6/m</i> | 38.3739 | 3.4752 |
| TfpTP-OEt  | <i>P6/m</i> | 38.6460 | 3.9846 |
| TfpTP-OMEG | <i>P6/m</i> | 38.6424 | 3.9980 |
| TfpTP-ODEG | <i>P6/m</i> | 38.6385 | 4.0044 |
| TfpTP-OTEG | <i>P6/m</i> | 38.6321 | 3.9951 |

Table S2. Atom positions of **TfpTP-H**.

| <b>TfpTP-H</b> |            |            |            |
|----------------|------------|------------|------------|
| Atom           | <i>x/a</i> | <i>y/b</i> | <i>z/c</i> |
| O1             | 0.29617    | 0.58578    | 0.50000    |
| N2             | 0.37054    | 0.58780    | 0.50000    |
| C3             | 0.31333    | 0.62237    | 0.50000    |
| C4             | 0.35819    | 0.64625    | 0.50000    |
| C5             | 0.38298    | 0.63015    | 0.50000    |
| C6             | 0.47462    | 0.51776    | 0.50000    |
| C7             | 0.45841    | 0.47566    | 0.50000    |
| C8             | 0.51698    | 0.54156    | 0.50000    |
| H9             | 0.42655    | 0.45489    | 0.50000    |
| H10            | 0.41487    | 0.65120    | 0.50000    |
| H11            | 0.53232    | 0.57389    | 0.50000    |
| H12            | 0.34019    | 0.56620    | 0.50000    |
| C13            | 0.44786    | 0.53646    | 0.50000    |
| C14            | 0.39741    | 0.57165    | 0.50000    |
| C15            | 0.38090    | 0.52986    | 0.50000    |
| C16            | 0.40539    | 0.51252    | 0.50000    |
| C17            | 0.46416    | 0.57870    | 0.50000    |
| C18            | 0.43949    | 0.59591    | 0.50000    |
| H19            | 0.45418    | 0.62823    | 0.50000    |
| H20            | 0.49601    | 0.59951    | 0.50000    |
| H21            | 0.38994    | 0.48019    | 0.50000    |
| H22            | 0.34857    | 0.51037    | 0.50000    |

Table S3. Atom positions of **TfpTP-OEt**

| <b>TfpTP-OEt</b> |            |            |            |
|------------------|------------|------------|------------|
| Atom             | <i>x/a</i> | <i>y/b</i> | <i>z/c</i> |
| H1               | 0.58191    | 0.65850    | 0.72311    |
| H2               | 0.59467    | 0.60133    | 0.72577    |
| O3               | 0.29730    | 0.58639    | 0.50000    |



|     |         |         |         |
|-----|---------|---------|---------|
| N4  | 0.37163 | 0.58939 | 0.50000 |
| C5  | 0.31395 | 0.62271 | 0.50000 |
| C6  | 0.35848 | 0.64688 | 0.50000 |
| C7  | 0.38348 | 0.63133 | 0.50000 |
| C8  | 0.47679 | 0.52031 | 0.50000 |
| C9  | 0.45891 | 0.47818 | 0.50000 |
| C10 | 0.51937 | 0.54232 | 0.50000 |
| H11 | 0.42731 | 0.46020 | 0.50000 |
| H12 | 0.41507 | 0.65254 | 0.50000 |
| O13 | 0.53952 | 0.58443 | 0.50000 |
| H14 | 0.34158 | 0.56765 | 0.50000 |
| C15 | 0.45007 | 0.53957 | 0.50000 |
| C16 | 0.39870 | 0.57382 | 0.50000 |
| C17 | 0.38290 | 0.53252 | 0.50000 |
| C18 | 0.40761 | 0.51575 | 0.50000 |
| C19 | 0.46527 | 0.58156 | 0.50000 |
| C20 | 0.44032 | 0.59817 | 0.50000 |
| C21 | 0.58214 | 0.60770 | 0.50000 |
| C22 | 0.59431 | 0.65158 | 0.50000 |
| H23 | 0.45452 | 0.63026 | 0.50000 |
| H24 | 0.49629 | 0.60342 | 0.50000 |
| H25 | 0.62736 | 0.67044 | 0.50000 |
| H26 | 0.39158 | 0.48372 | 0.50000 |
| H27 | 0.35082 | 0.51285 | 0.50000 |

Table S4. Atom positions of **TfpTP-OMEG**

| <b>TfpTP-OMEG</b> |                   |                   |                   |
|-------------------|-------------------|-------------------|-------------------|
| <b>Atom</b>       | <b><i>x/a</i></b> | <b><i>y/b</i></b> | <b><i>z/c</i></b> |
| H1                | 0.59499           | 0.60132           | 0.72484           |
| H2                | 0.41765           | 0.34199           | 0.27568           |
| O3                | 0.29720           | 0.58637           | 0.50000           |
| N4                | 0.37148           | 0.58927           | 0.50000           |
| C5                | 0.31389           | 0.62270           | 0.50000           |
| C6                | 0.35843           | 0.64682           | 0.50000           |
| C7                | 0.38338           | 0.63122           | 0.50000           |
| C8                | 0.47676           | 0.52029           | 0.50000           |
| C9                | 0.45891           | 0.47817           | 0.50000           |
| C10               | 0.51937           | 0.54234           | 0.50000           |
| H11               | 0.42732           | 0.46021           | 0.50000           |
| H12               | 0.41498           | 0.65240           | 0.50000           |
| O13               | 0.53959           | 0.58451           | 0.50000           |
| H14               | 0.34144           | 0.56754           | 0.50000           |
| C15               | 0.44997           | 0.53948           | 0.50000           |
| C16               | 0.39856           | 0.57369           | 0.50000           |

|     |         |         |         |
|-----|---------|---------|---------|
| C17 | 0.38277 | 0.53239 | 0.50000 |
| C18 | 0.40750 | 0.51563 | 0.50000 |
| C19 | 0.46513 | 0.58144 | 0.50000 |
| C20 | 0.44018 | 0.59804 | 0.50000 |
| C21 | 0.58241 | 0.60770 | 0.50000 |
| C22 | 0.59529 | 0.65185 | 0.50000 |
| H23 | 0.45440 | 0.63012 | 0.50000 |
| H24 | 0.49612 | 0.60325 | 0.50000 |
| H25 | 0.39149 | 0.48359 | 0.50000 |
| H26 | 0.35069 | 0.51271 | 0.50000 |
| O27 | 0.36264 | 0.32524 | 0.50000 |
| C28 | 0.35214 | 0.28489 | 0.50000 |

Table S5. Atom positions of **TfpTP-ODEG**

| <b>TfpTP-ODEG</b> |            |            |            |
|-------------------|------------|------------|------------|
| <b>Atom</b>       | <b>x/a</b> | <b>y/b</b> | <b>z/c</b> |
| H1                | 0.59532    | 0.60148    | 0.72450    |
| H2                | 0.41762    | 0.34213    | 0.27601    |
| O3                | 0.29725    | 0.58637    | 0.50000    |
| N4                | 0.37159    | 0.58935    | 0.50000    |
| C5                | 0.31393    | 0.62270    | 0.50000    |
| C6                | 0.35846    | 0.64686    | 0.50000    |
| C7                | 0.38346    | 0.63130    | 0.50000    |
| C8                | 0.47682    | 0.52034    | 0.50000    |
| C9                | 0.45892    | 0.47820    | 0.50000    |
| C10               | 0.51944    | 0.54235    | 0.50000    |
| H11               | 0.42738    | 0.46022    | 0.50000    |
| H12               | 0.41506    | 0.65251    | 0.50000    |
| O13               | 0.53981    | 0.58453    | 0.50000    |
| H14               | 0.34153    | 0.56763    | 0.50000    |
| C15               | 0.45004    | 0.53954    | 0.50000    |
| C16               | 0.39868    | 0.57379    | 0.50000    |
| C17               | 0.38286    | 0.53249    | 0.50000    |
| C18               | 0.40757    | 0.51570    | 0.50000    |
| C19               | 0.46524    | 0.58150    | 0.50000    |
| C20               | 0.44031    | 0.59813    | 0.50000    |
| C21               | 0.58260    | 0.60770    | 0.50000    |
| C22               | 0.59536    | 0.65170    | 0.50000    |
| H23               | 0.45453    | 0.63022    | 0.50000    |
| H24               | 0.49625    | 0.60326    | 0.50000    |
| H25               | 0.39155    | 0.48367    | 0.50000    |
| H26               | 0.35076    | 0.51288    | 0.50000    |
| O27               | 0.36257    | 0.32573    | 0.50000    |
| C28               | 0.35152    | 0.28500    | 0.50000    |

|     |         |         |         |
|-----|---------|---------|---------|
| C29 | 0.69387 | 0.74127 | 0.50000 |
| O30 | 0.70489 | 0.78174 | 0.50000 |
| C31 | 0.74654 | 0.80211 | 0.50000 |

Table S6. Atom positions of **TfpTP-OTEG**

| <b>TfpTP-OTEG</b> |                   |                   |                   |
|-------------------|-------------------|-------------------|-------------------|
| <b>Atom</b>       | <b><i>x/a</i></b> | <b><i>y/b</i></b> | <b><i>z/c</i></b> |
| H1                | 0.59560           | 0.60083           | 0.72481           |
| H2                | 0.41548           | 0.34156           | 0.27557           |
| O3                | 0.29747           | 0.58637           | 0.50000           |
| N4                | 0.37195           | 0.58967           | 0.50000           |
| C5                | 0.31406           | 0.62270           | 0.50000           |
| C6                | 0.35860           | 0.64701           | 0.50000           |
| C7                | 0.38372           | 0.63159           | 0.50000           |
| C8                | 0.47701           | 0.52054           | 0.50000           |
| C9                | 0.45896           | 0.47838           | 0.50000           |
| C10               | 0.51963           | 0.54242           | 0.50000           |
| H11               | 0.42743           | 0.46057           | 0.50000           |
| H12               | 0.41532           | 0.65285           | 0.50000           |
| O13               | 0.54026           | 0.58466           | 0.50000           |
| H14               | 0.34191           | 0.56791           | 0.50000           |
| C15               | 0.45033           | 0.53983           | 0.50000           |
| C16               | 0.39906           | 0.57416           | 0.50000           |
| C17               | 0.38319           | 0.53287           | 0.50000           |
| C18               | 0.40784           | 0.51604           | 0.50000           |
| C19               | 0.46562           | 0.58181           | 0.50000           |
| C20               | 0.44071           | 0.59849           | 0.50000           |
| C21               | 0.58311           | 0.60736           | 0.50000           |
| C22               | 0.59697           | 0.65164           | 0.50000           |
| H23               | 0.45493           | 0.63059           | 0.50000           |
| H24               | 0.49667           | 0.60349           | 0.50000           |
| H25               | 0.39171           | 0.48401           | 0.50000           |
| H26               | 0.35109           | 0.51328           | 0.50000           |
| O27               | 0.36093           | 0.32702           | 0.50000           |
| C28               | 0.34828           | 0.28595           | 0.50000           |
| C29               | 0.69724           | 0.73828           | 0.50000           |
| O30               | 0.71074           | 0.77933           | 0.50000           |
| C31               | 0.75251           | 0.79714           | 0.50000           |
| C32               | 0.22754           | 0.15733           | 0.50000           |
| O33               | 0.18590           | 0.14015           | 0.50000           |
| C34               | 0.17131           | 0.09901           | 0.50000           |

### Section S4. Saturation recovery analysis of each COF

Figure S1. TfpTP-H COF  $^{13}\text{C}$  saturation recovery analysis

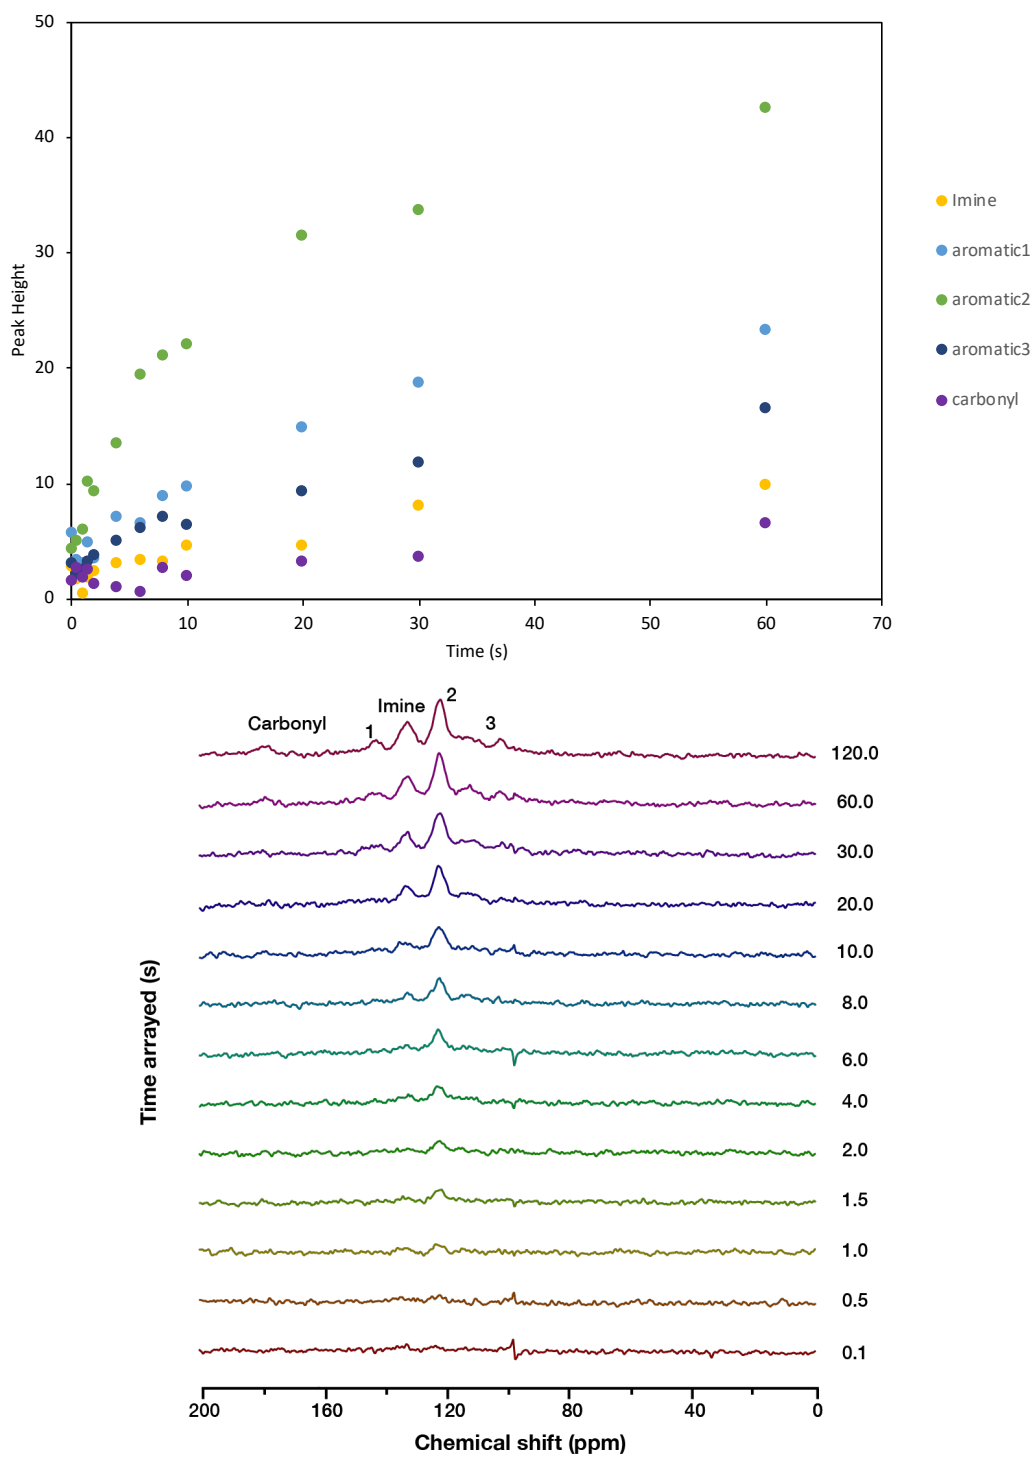

Figure S2. TfpTP-OEt COF <sup>13</sup>C saturation recovery analysis

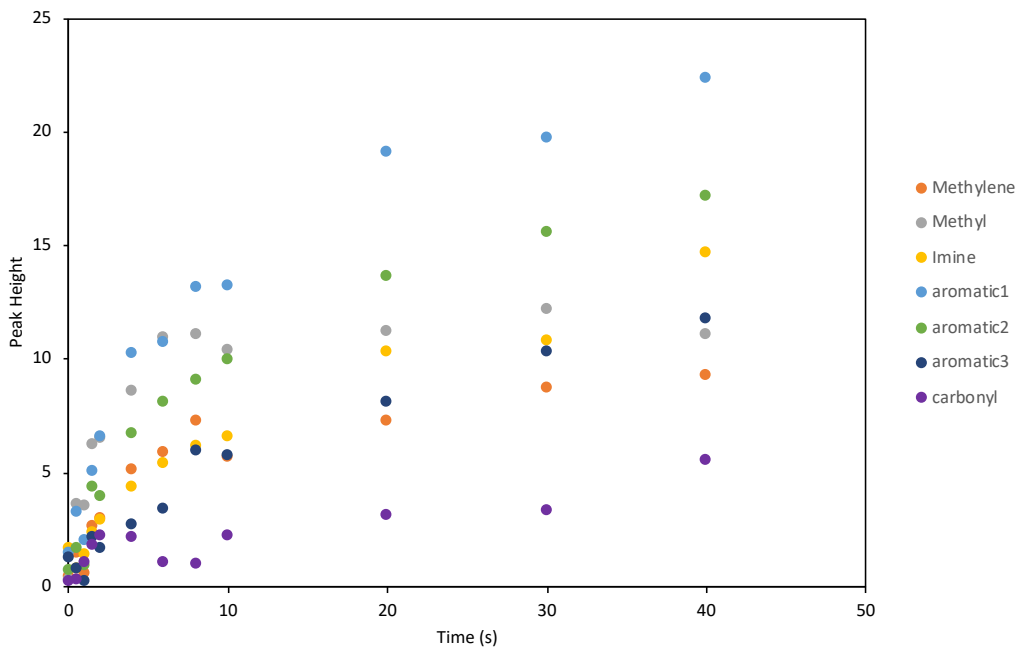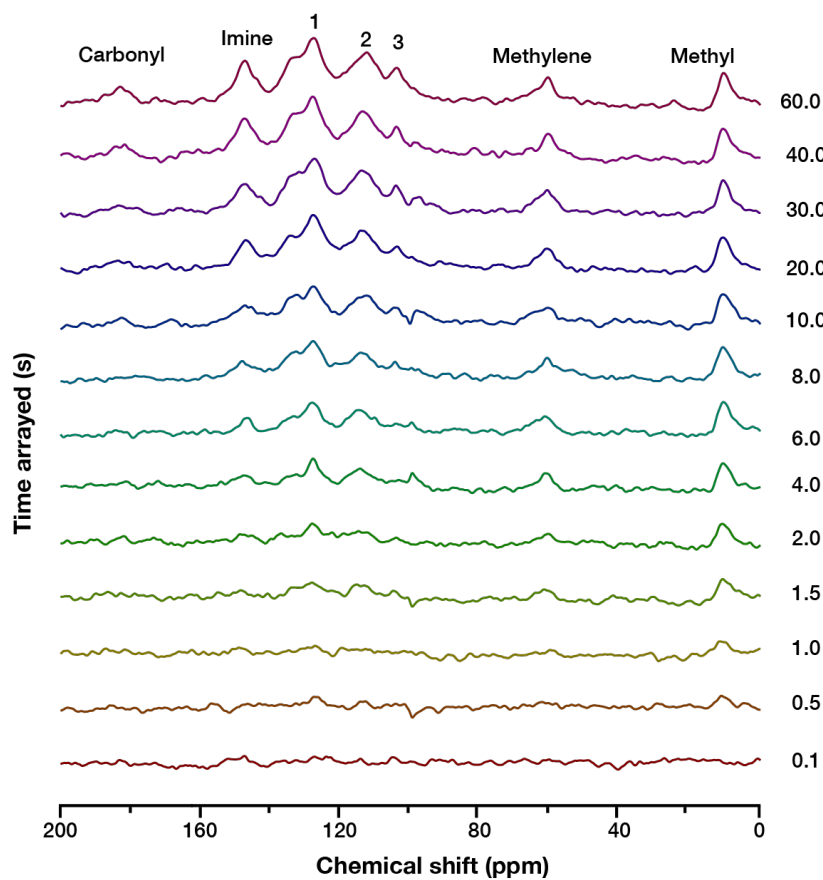

Figure S3. TfpTP-OMEG COF  $^{13}\text{C}$  saturation recovery analysis

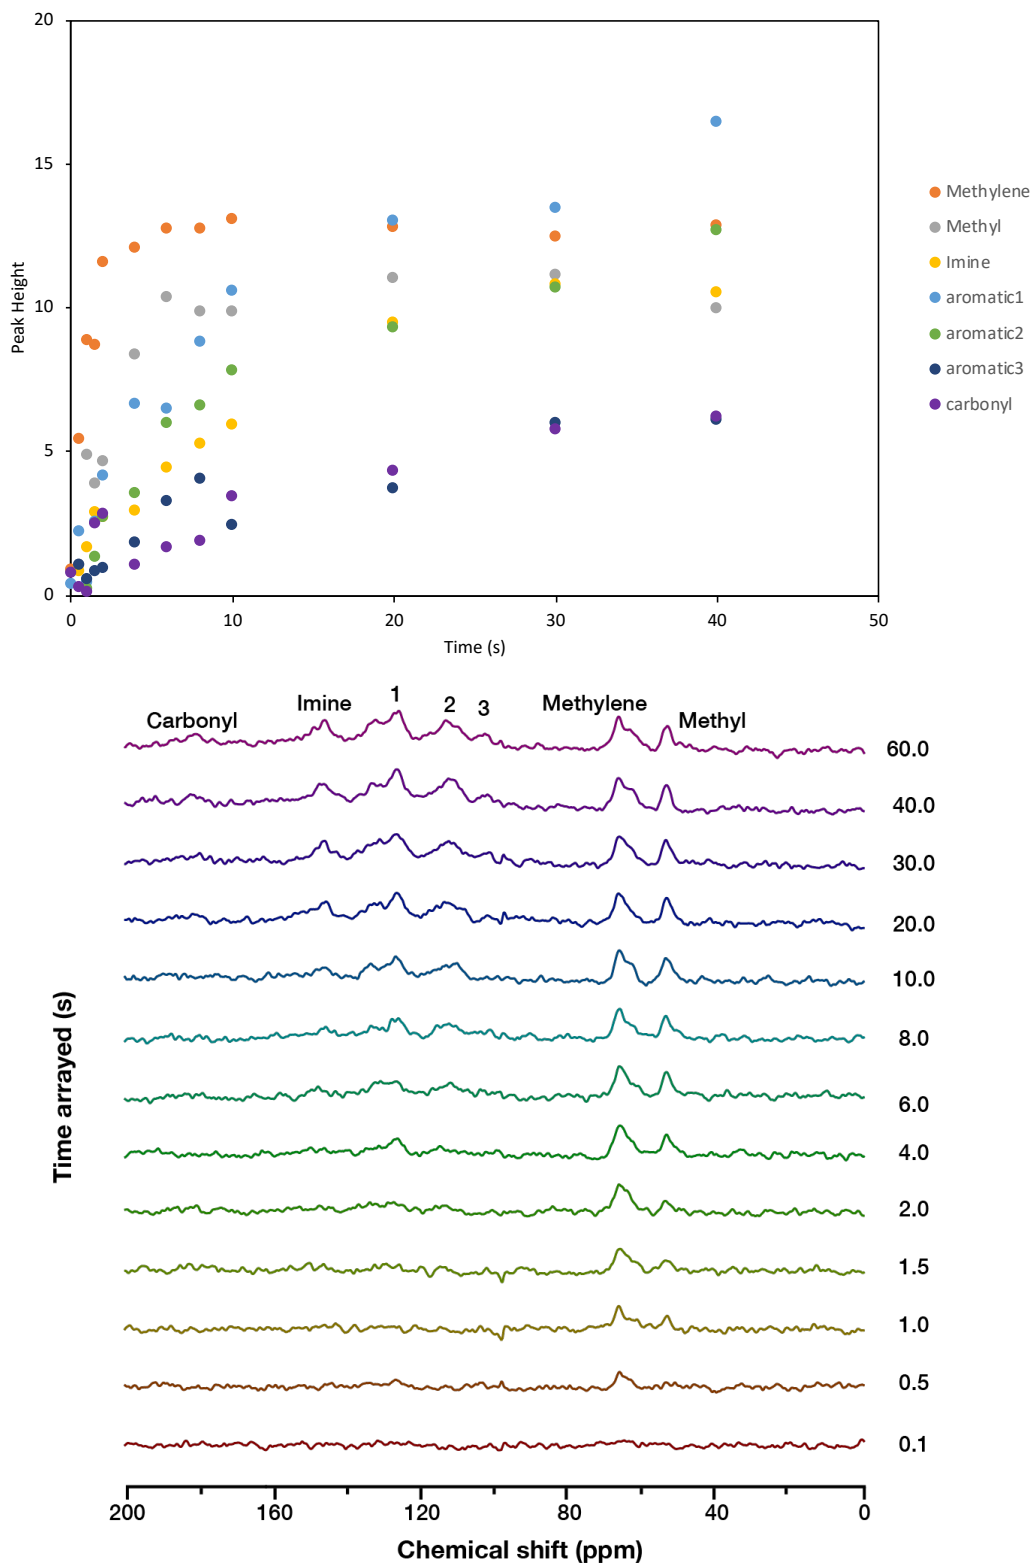

Figure S4. TfpTP-ODEG COF  $^{13}\text{C}$  saturation recovery analysis

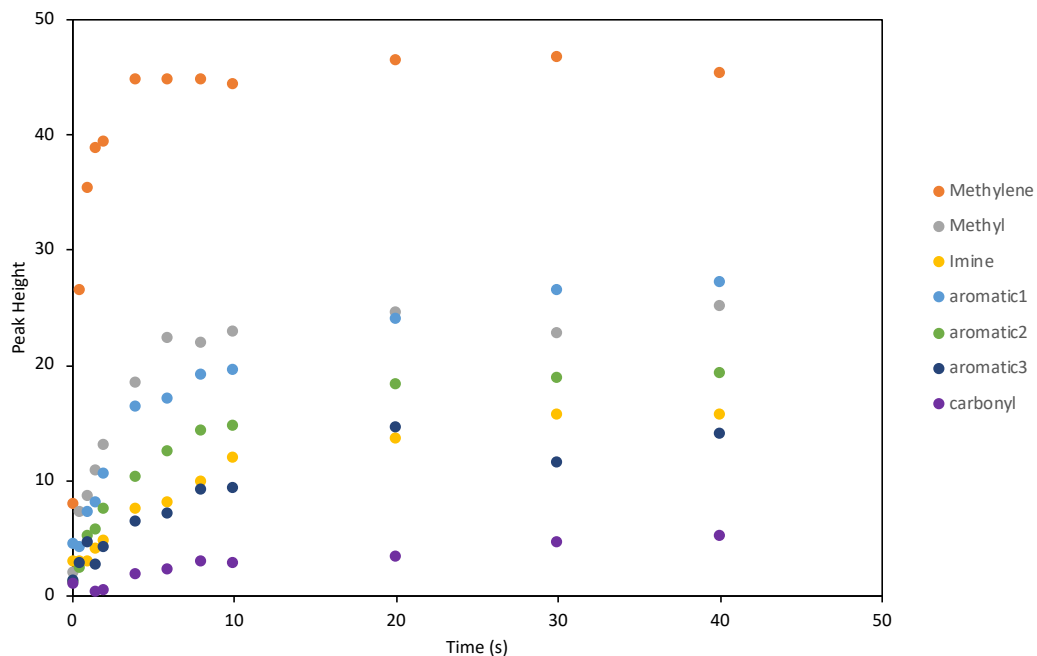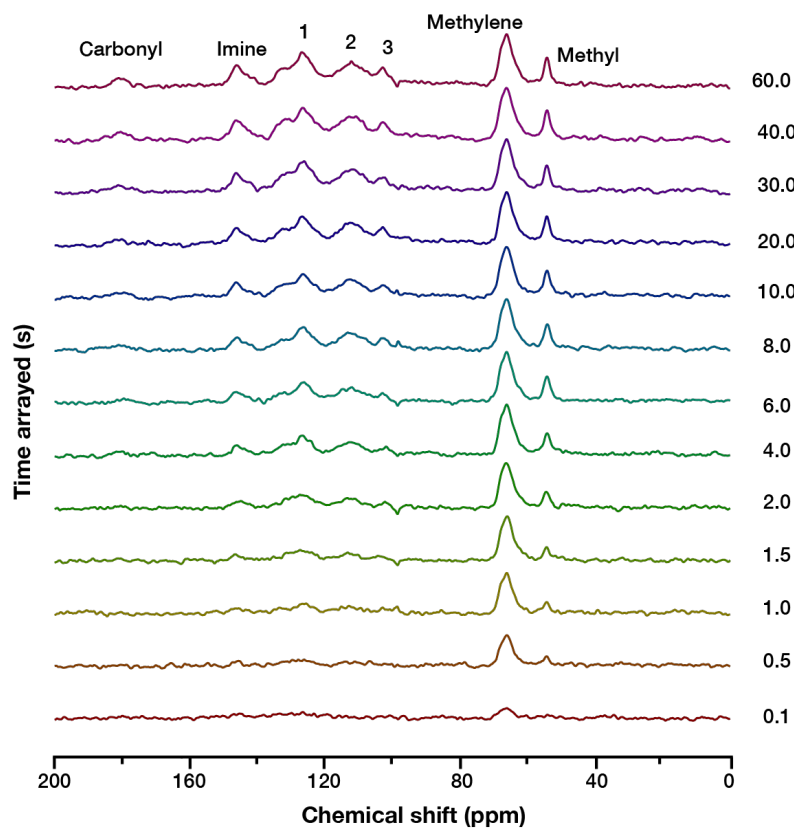

Figure S5. TfpTP-ODEG COF  $^{13}\text{C}$  saturation recovery analysis

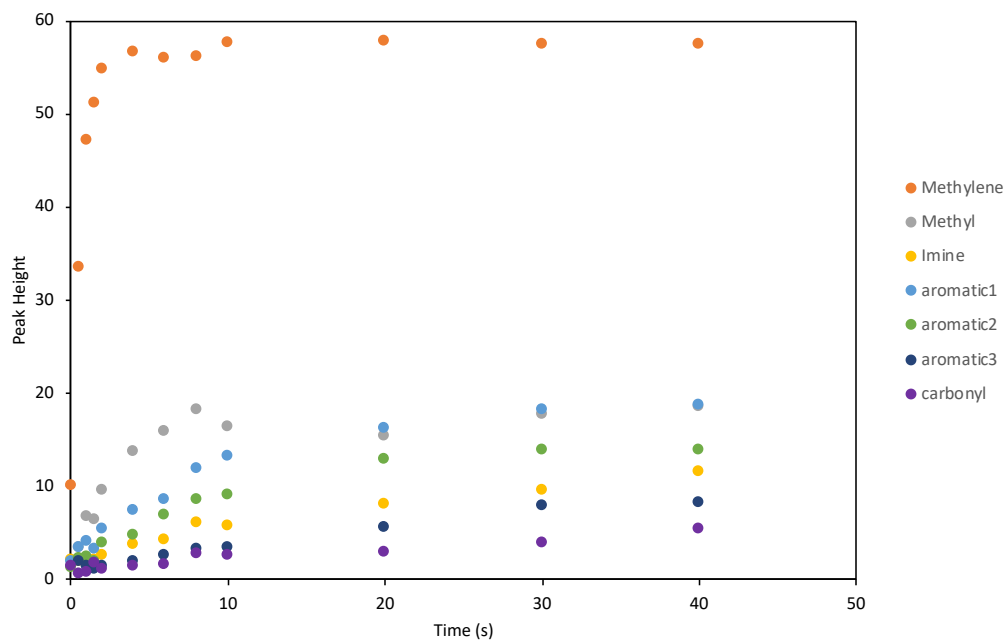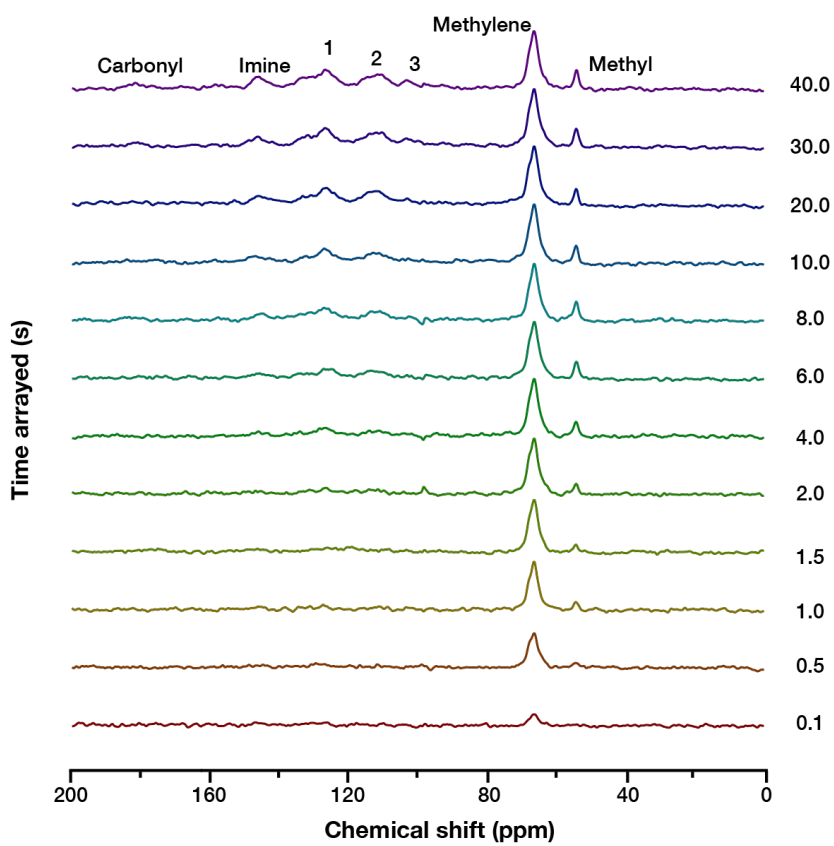



Table S7. T1 calculated constants

| COF               | Peak       | T1          | Std. dev.  |
|-------------------|------------|-------------|------------|
|                   |            |             |            |
| <b>TfpTP-H</b>    |            |             |            |
|                   | Carbonyl   | 33.51554019 | 1.22853479 |
|                   | Imine      | 29.07007499 | 1.29449611 |
|                   | Aromatic 1 | 23.37267896 | 2.36505477 |
|                   | Aromatic 2 | 14.27862036 | 3.59814115 |
|                   | Aromatic 3 | 15.54038319 | 1.62870461 |
|                   | Aromatic 4 | 23.58139027 | 0.54758113 |
|                   |            |             |            |
| <b>TfpTP-OEt</b>  |            |             |            |
|                   | Carbonyl   | 27.25114224 | 0.90694629 |
|                   | Imine      | 17.56359706 | 1.01877924 |
|                   | Aromatic 1 | 10.17916103 | 1.68357824 |
|                   | Aromatic 2 | 12.27625202 | 1.14322238 |
|                   | Aromatic 3 | 18.09525302 | 0.68171869 |
|                   | Methylene  | 7.665132614 | 1.00879912 |
|                   | Methyl     | 2.306548604 | 0.6608706  |
|                   |            |             |            |
| <b>TfpTP-OMEG</b> |            |             |            |
|                   | Carbonyl   | 19.11118614 | 0.89171777 |
|                   | Imine      | 15.75019576 | 0.90907115 |
|                   | Aromatic 1 | 11.23203517 | 1.10870297 |
|                   | Aromatic 2 | 12.28876969 | 1.14693784 |
|                   | Aromatic 3 | 18.2546477  | 0.89347743 |
|                   | Methylene  | 1.348947271 | 1.45081684 |
|                   | Methyl     | 2.765489124 | 0.79762573 |
|                   |            |             |            |
| <b>TfpTP-ODEG</b> |            |             |            |
|                   | Carbonyl   | 19.86286339 | 1.06050189 |
|                   | Imine      | 9.586386044 | 1.56307023 |
|                   | Aromatic 1 | 6.793677455 | 2.83913723 |

|                   |            |             |            |
|-------------------|------------|-------------|------------|
|                   | Aromatic 2 | 7.036298776 | 1.67704621 |
|                   | Aromatic 3 | 9.765533016 | 1.7043793  |
|                   | Methylene  | 0.705406526 | 1.99451193 |
|                   | Methyl     | 2.71352315  | 1.37003292 |
|                   |            |             |            |
| <b>TfpTP-OTEG</b> |            |             |            |
|                   | Carbonyl   | 16.27824313 | 0.69859408 |
|                   | Imine      | 12.84786604 | 1.01106438 |
|                   | Aromatic 1 | 8.084473521 | 1.14372623 |
|                   | Aromatic 2 | 8.506226626 | 0.68053202 |
|                   | Aromatic 3 | 14.77968018 | 0.69513392 |
|                   | Methylene  | 0.588876041 | 0.93036114 |
|                   | Methyl     | 2.961691151 | 1.26893222 |

Section S5. TGA analysis

Figure S6. TfpTP-OEt COF

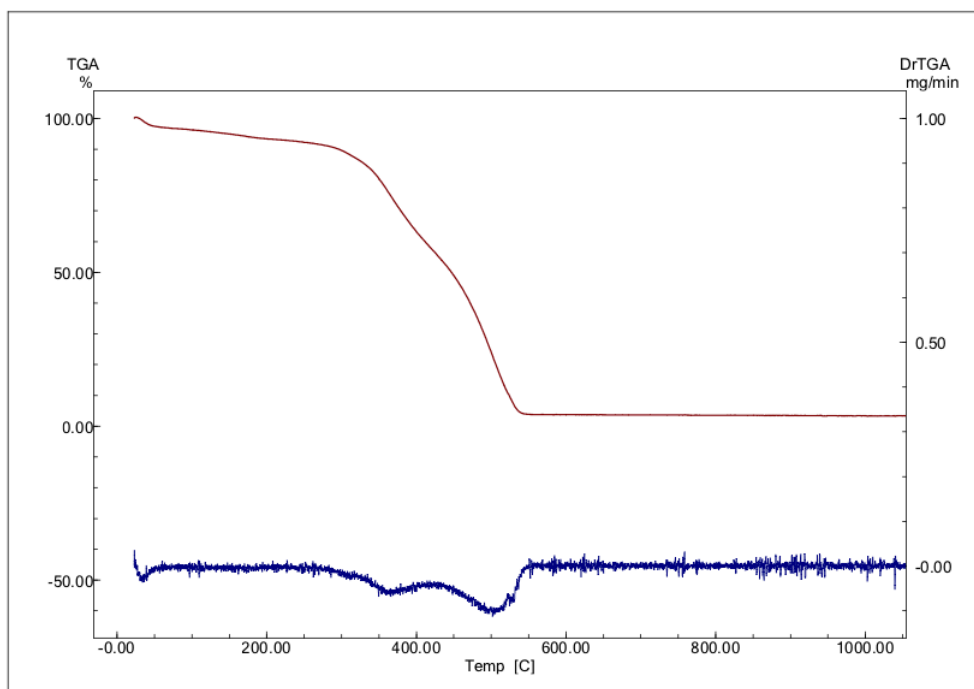

Figure S7. TfpTP-OMEG

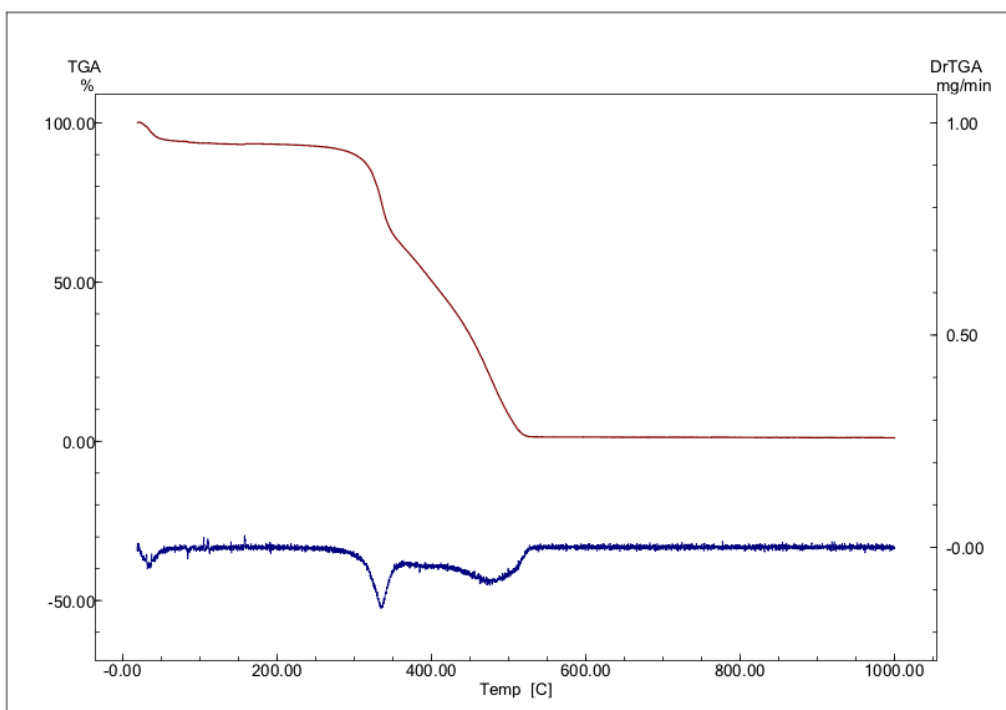

Figure S8. TfpTP-ODEG

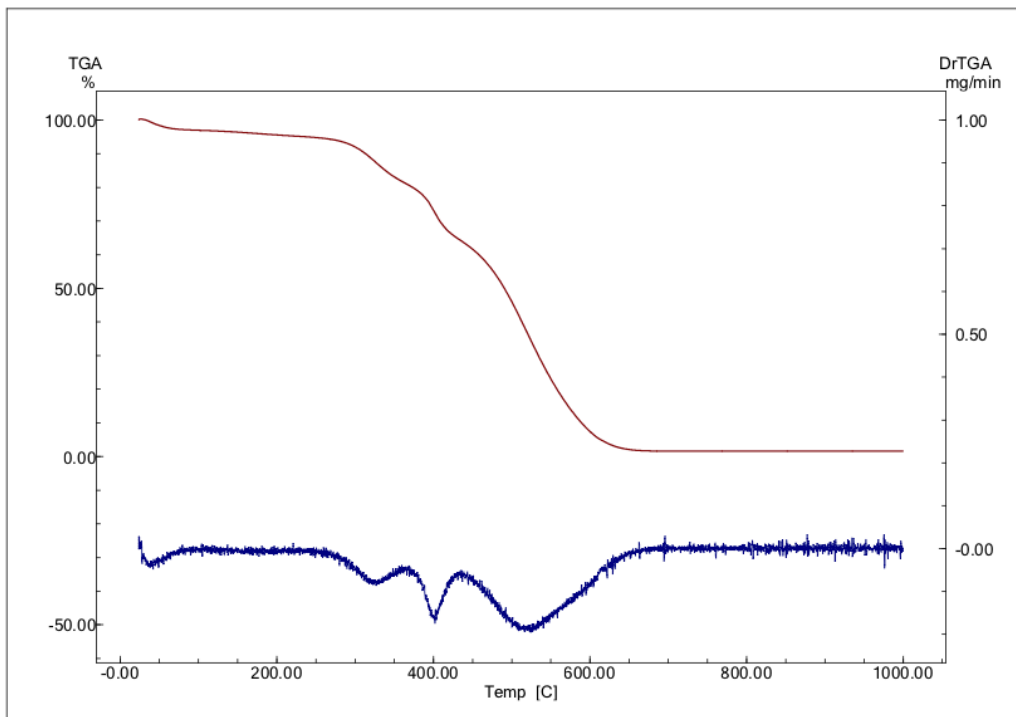

Figure S9. TfpTP-OPEG

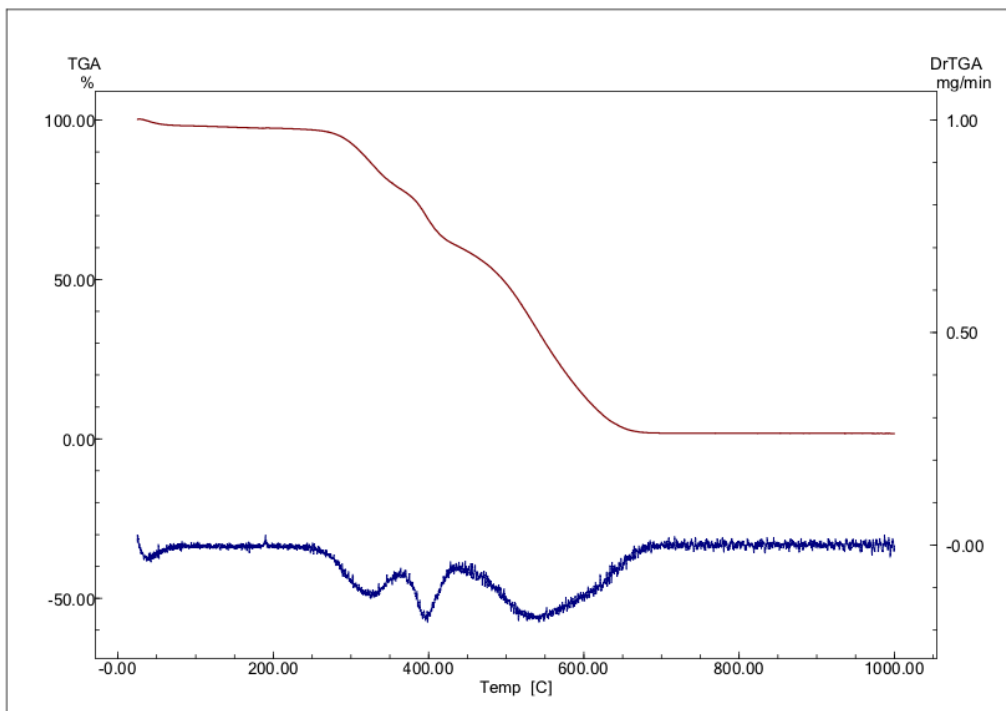

Section S6. FT-IR

Figure S10. FT-IR of TfpTP-H

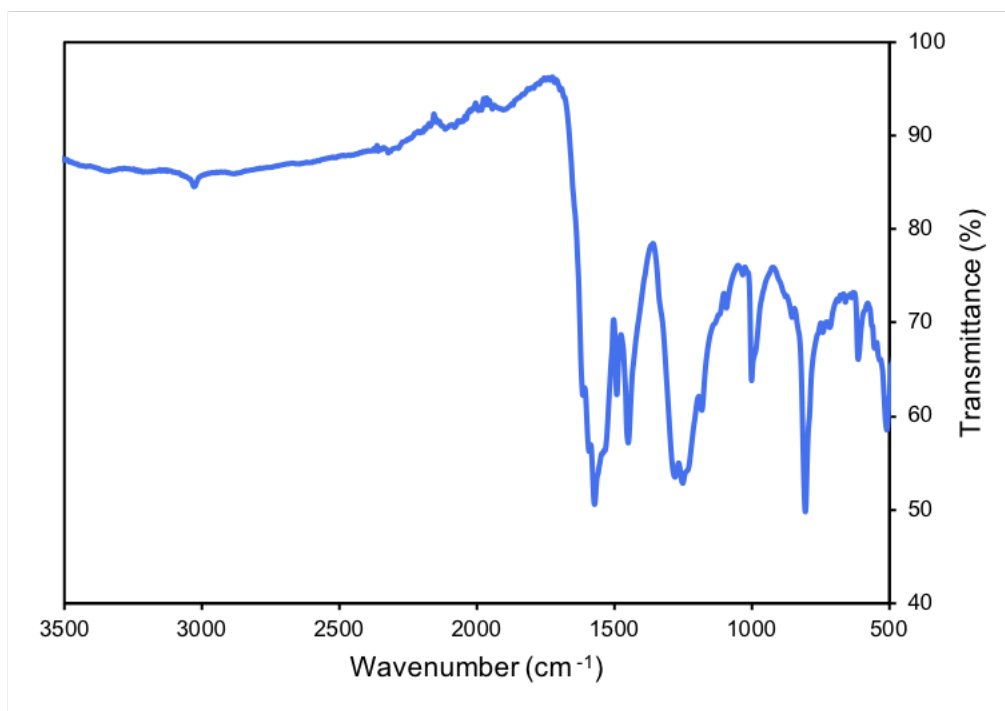

Figure S11. FT-IR of TfpTP-OEt

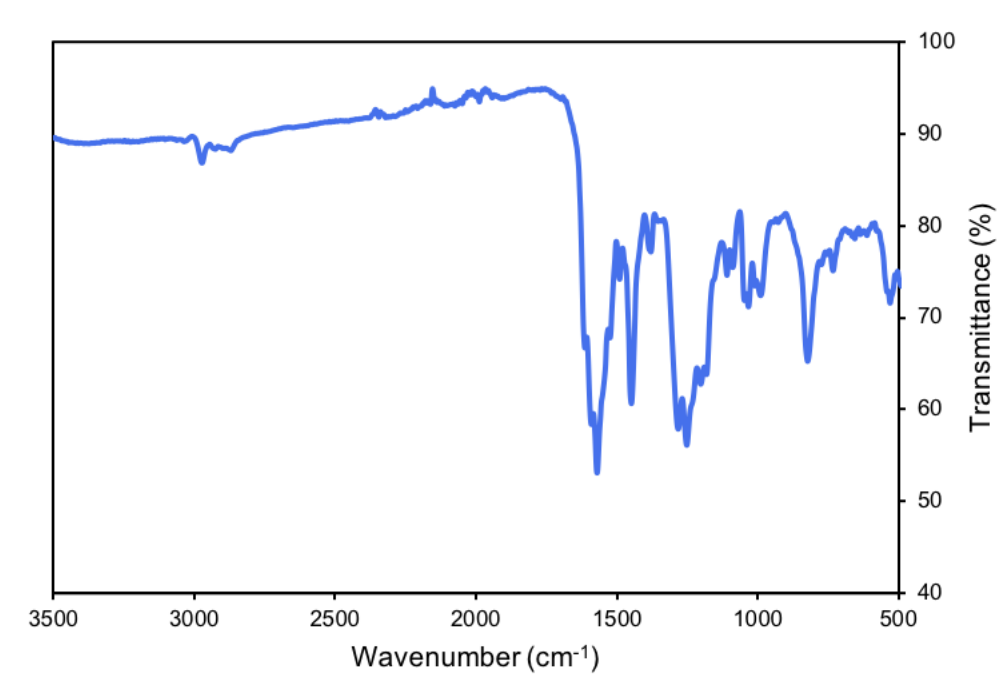

Figure S12. FT-IR of TfpTP-OMEG

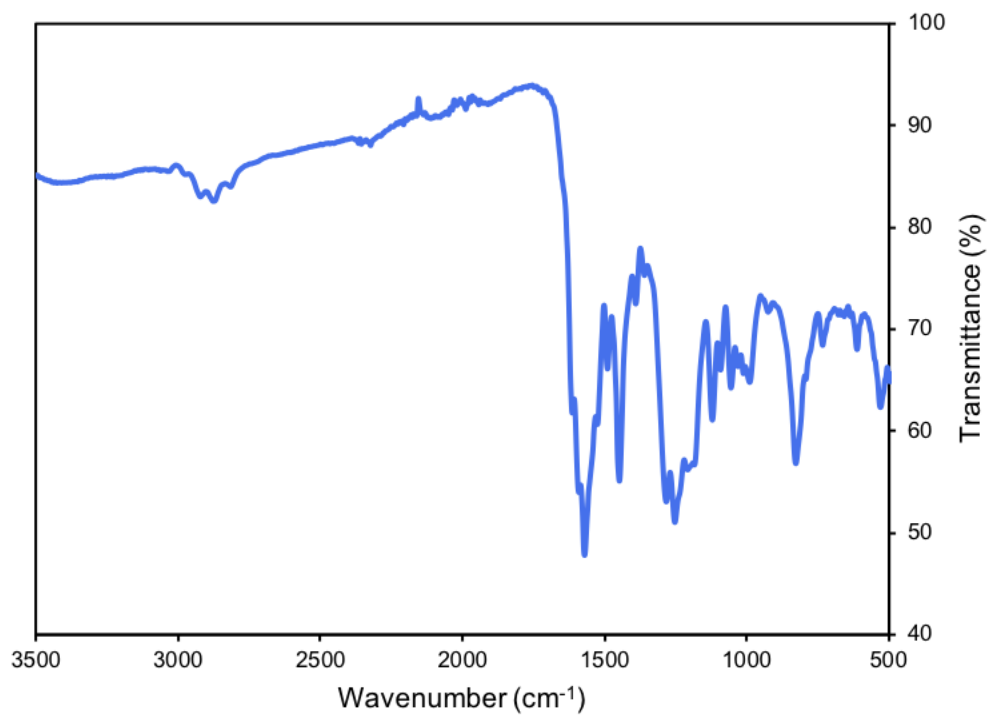

Figure S13. FT-IR of TfpTP-ODEG

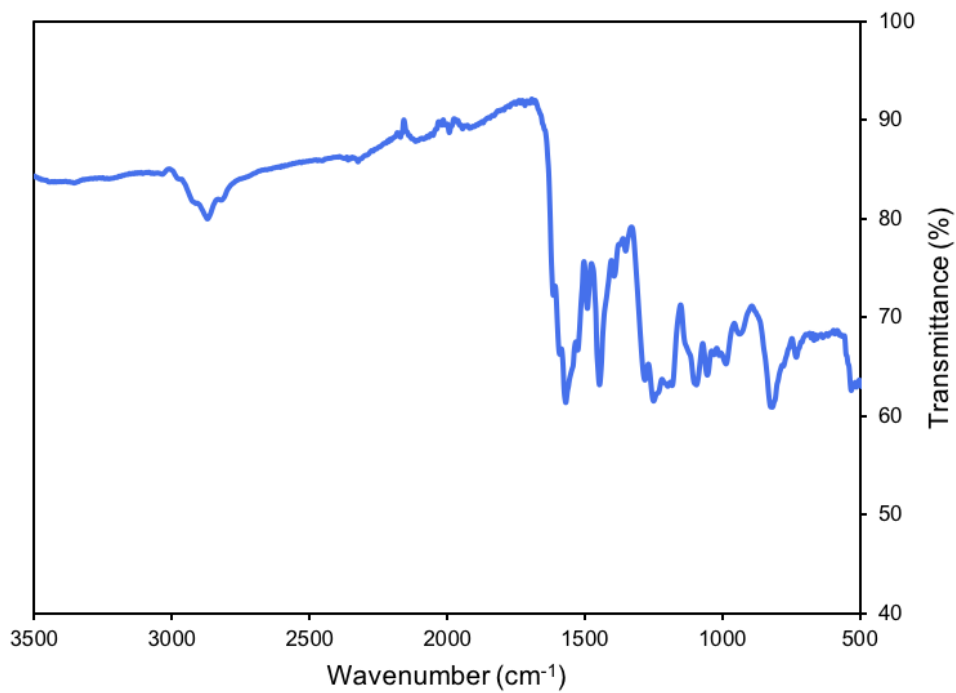

Figure S14. FT-IR of TfpTP-OTEG

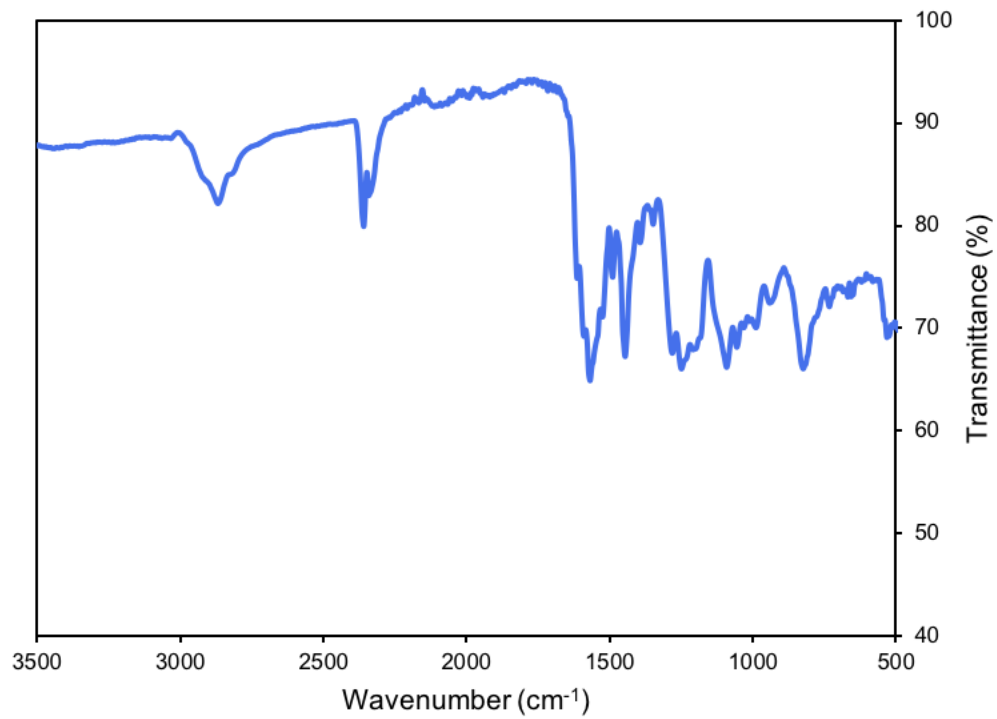

## Section S7. Molecular Dynamics (MD)

Molecular Dynamics (MD) simulations were performed using the LAMMPS simulation engine with a 1 femtosecond (fs) time step.<sup>S6</sup> We used the Dreiding force field to treat the interactions. Similar results were found with the UFF force field. The long-range electrostatics effects were treated using the Particle-Particle Particle-Mesh Ewald<sup>S7</sup> technique, with a real space cutoff of 10 Å and an accuracy tolerance of  $10^{-5}$ . For each MD simulation we started with the equilibrium geometry from 500 steps of Conjugated Gradient (CG) minimization (cell coordinates and atom positions) followed by 10 picoseconds (ps) of NVT dynamics to heat the system from 10 K to 298 K. Finally, we ran NPT dynamics at 1 atm and 298 K for 10 nanoseconds (ns) from which we collect all relevant data. The temperature damping constant was 0.1 ps while the pressure damping constant was 2.0 ps. The equations of motion used are those of Shinoda *et al.*<sup>S8</sup>, which combine the hydrostatic equations of Martyna *et al.*<sup>S9</sup> with the strain energy proposed by Parrinello and Rahman.<sup>S10</sup> The time integration schemes closely follow the time-reversible measure-preserving Verlet integrators derived by Tuckerman *et al.*<sup>S11</sup>

The different diffusion coefficients were calculated by calculating the mean squared deviation (MSD) and plot it with respect to the time. The backbone atoms (*e.g.*, C11, C12, C13) have around the same diffusion coefficient in the range of  $10^{-8}$  cm<sup>2</sup> s<sup>-1</sup>. On the other hand, the carbons that belong to the side chain (*e.g.*, C24, C25, C31, C32, C34) have a larger of magnitude for the diffusion coefficient of around  $10^{-7}$  cm<sup>2</sup> s<sup>-1</sup>.

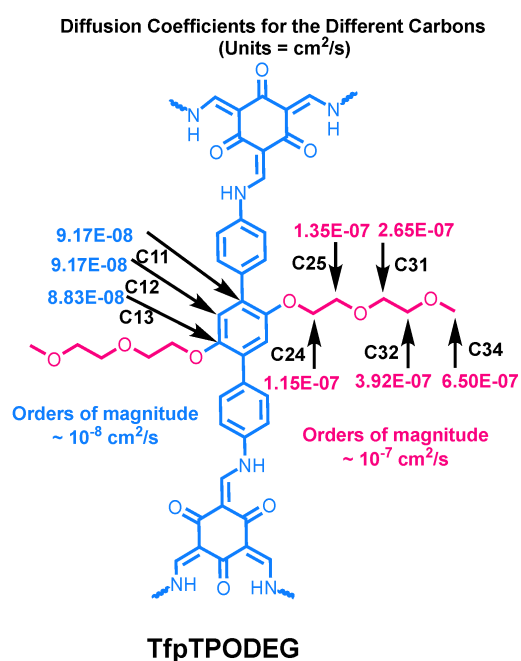

The fitting equation along with the R<sup>2</sup> valued are as follows (Units: x = ps, y = Å<sup>2</sup>):



C34:  $y = 0.0390x + 10.121$ ,  $R^2 = 0.9642$   
 C32:  $y = 0.0235x + 3.4685$ ,  $R^2 = 0.9659$   
 C31:  $y = 0.0159x + 1.6436$ ,  $R^2 = 0.9635$   
 C25:  $y = 0.0081x + 0.3808$ ,  $R^2 = 0.9597$   
 C24:  $y = 0.0069x + 0.0877$ ,  $R^2 = 0.9595$   
 C13:  $y = 0.0053x - 0.0487$ ,  $R^2 = 0.9459$   
 C12:  $y = 0.0055x - 0.0989$ ,  $R^2 = 0.9516$   
 C11:  $y = 0.0055x - 0.0981$ ,  $R^2 = 0.9581$

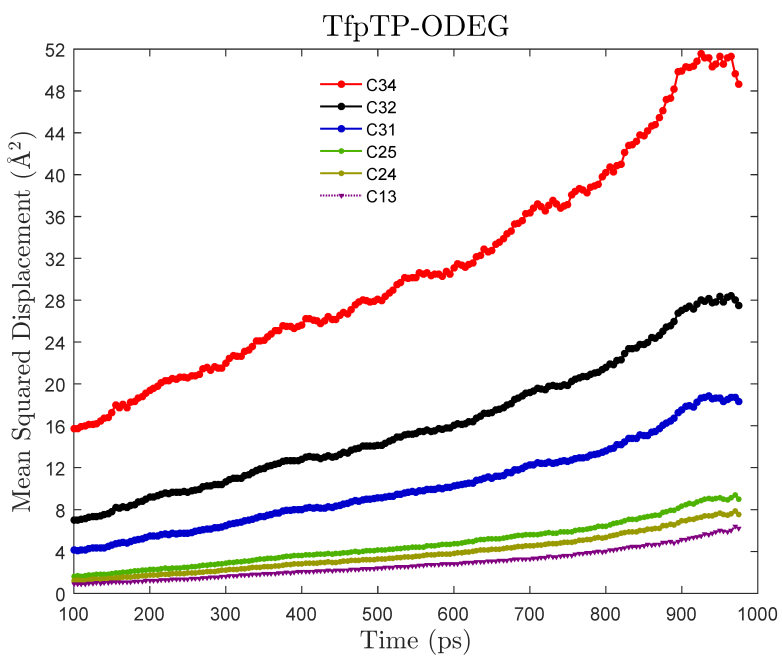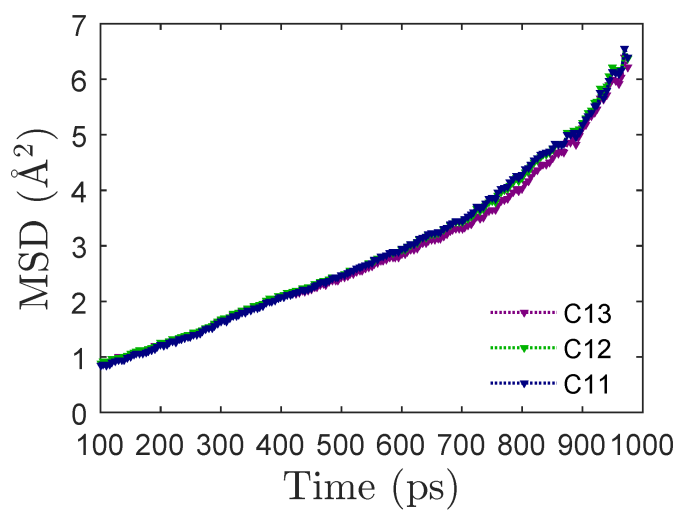

**Section S8. Solution NMR spectra**

**Figure S15. 4-amino-phenyl-boronic pinacol ester:**

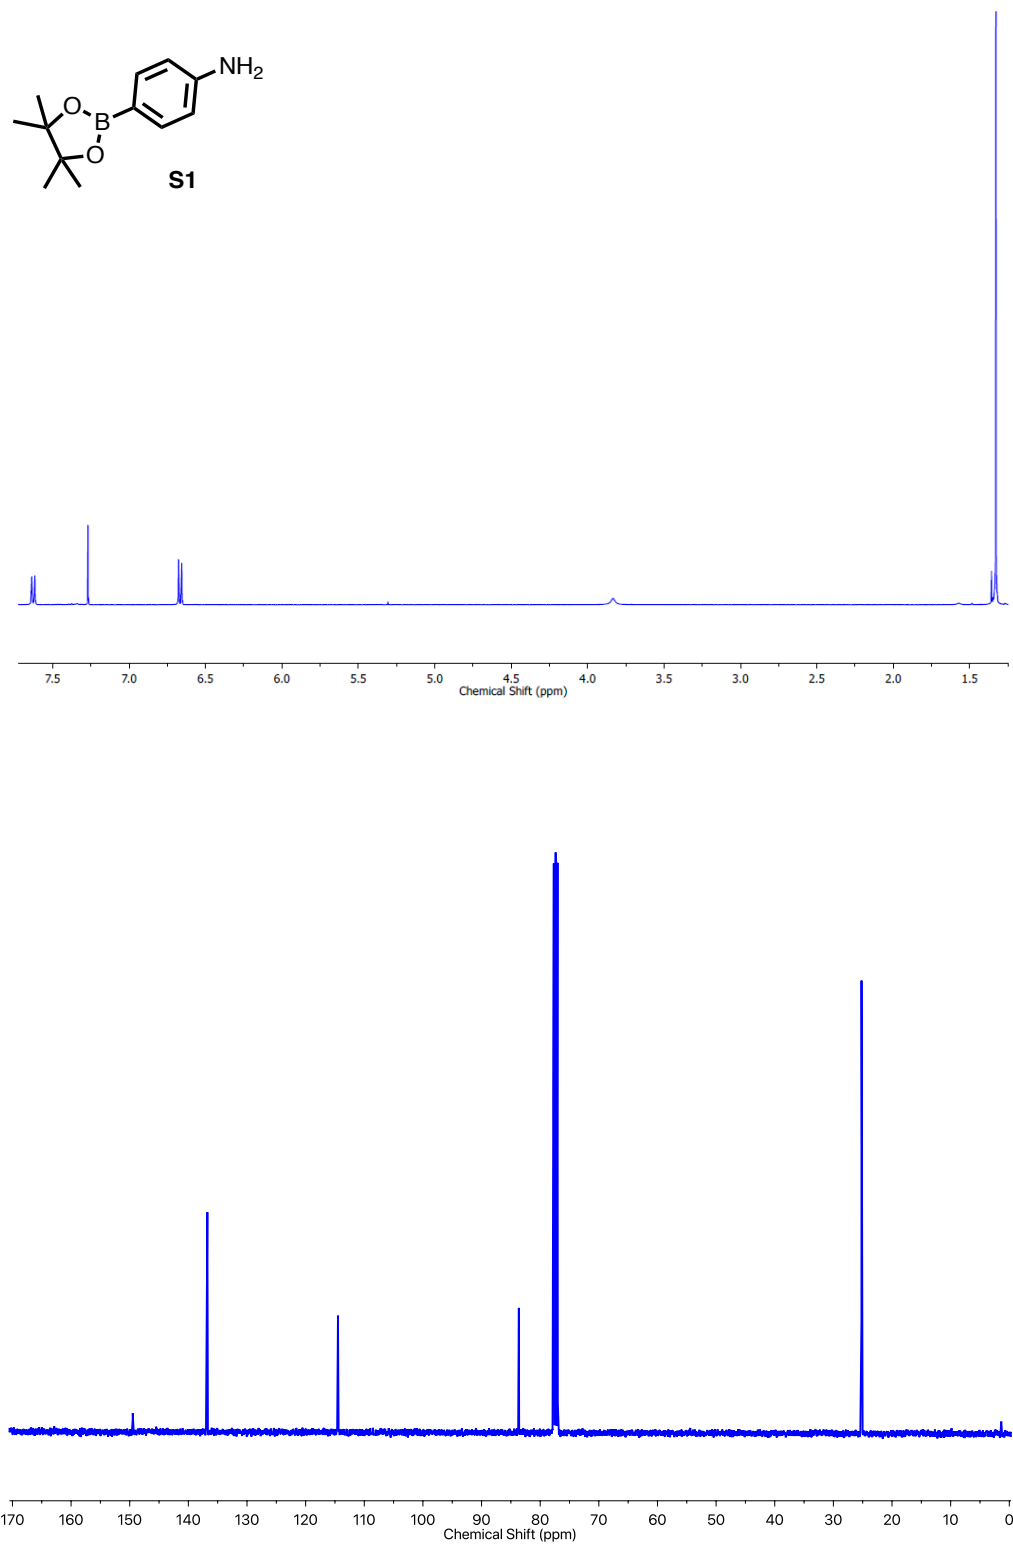

Figure S16. 2-methoxyethyl p-toluenesulfonate:

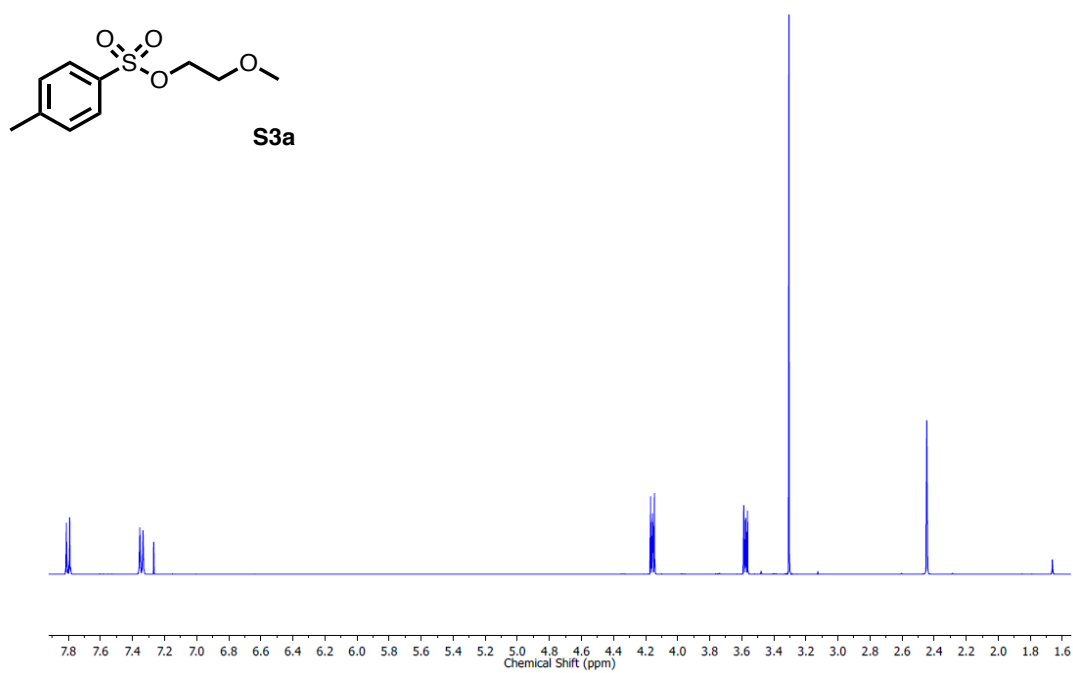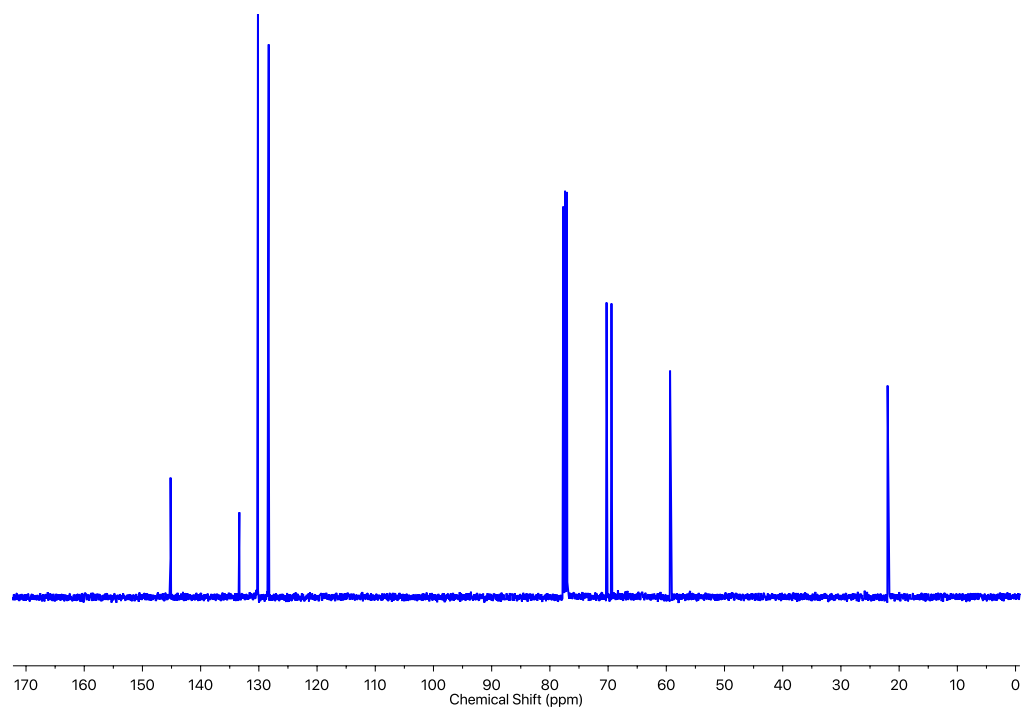

Figure S17. 2-(2-Methoxyethoxy) ethyl p-toluenesulfonate:

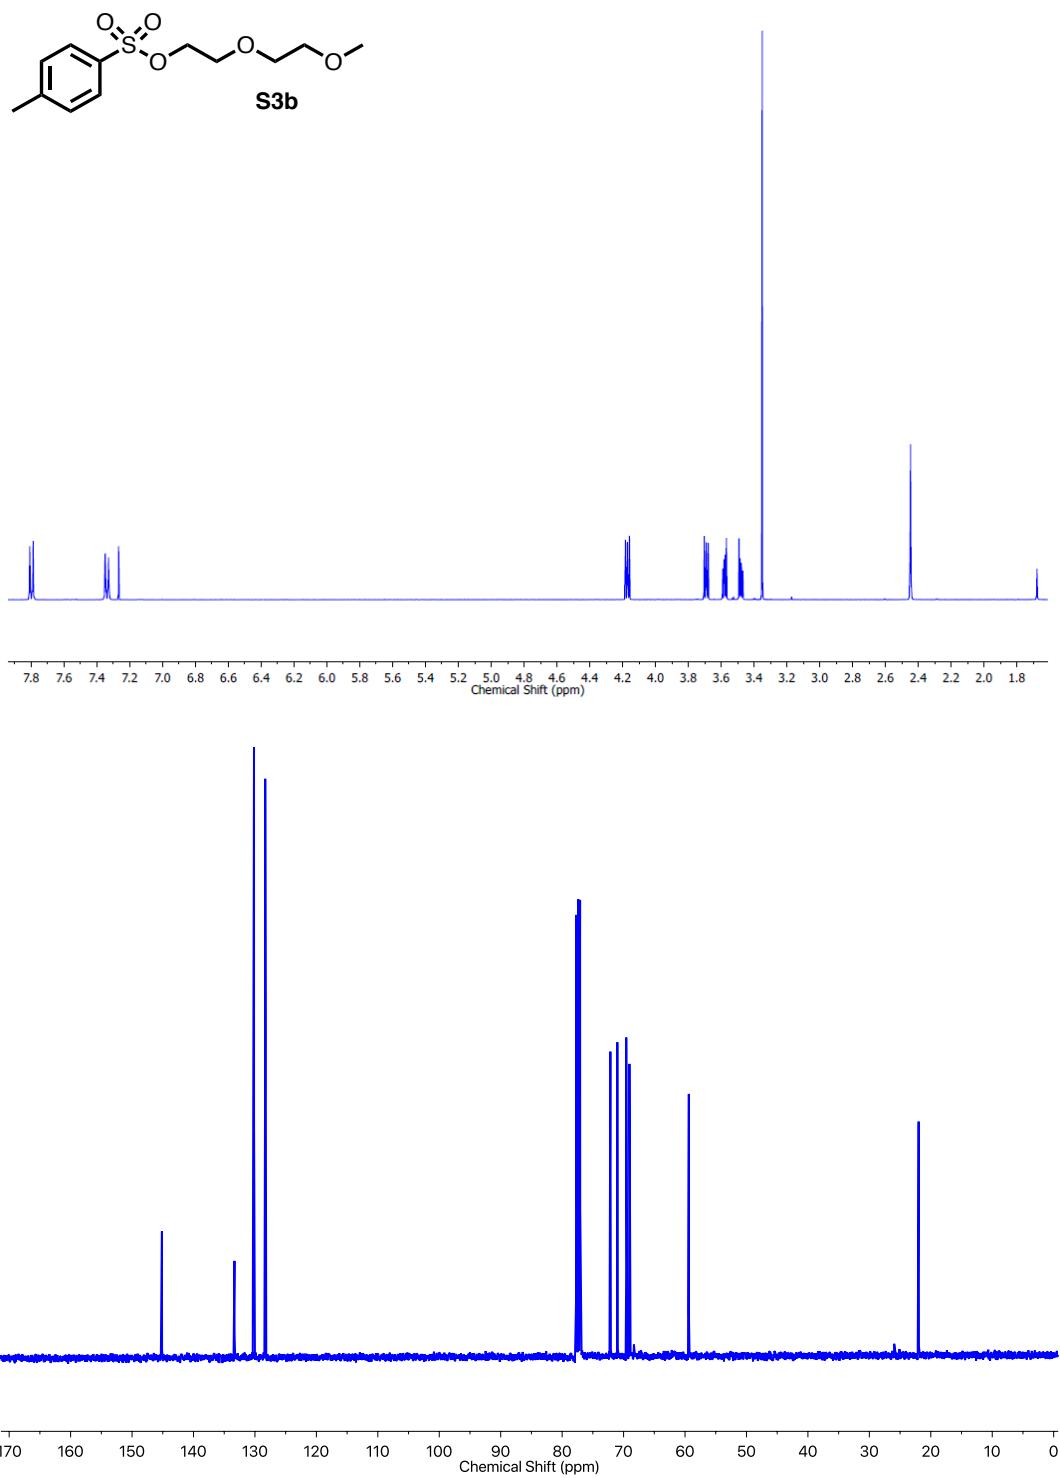

Figure S18. 3-(2-Methoxyethoxy) ethyl p-toluenesulfonate:

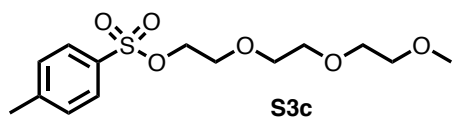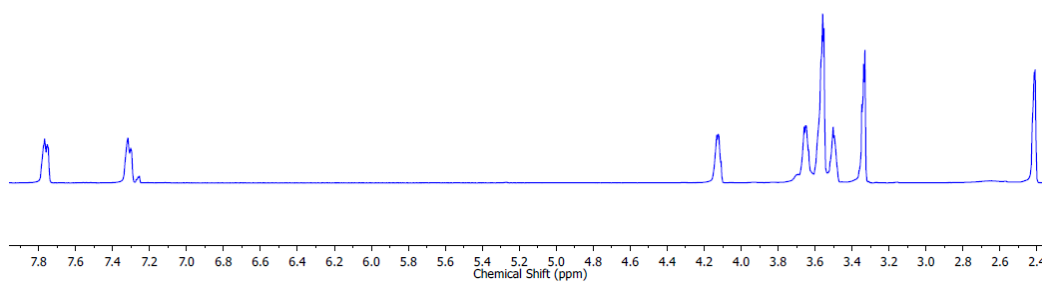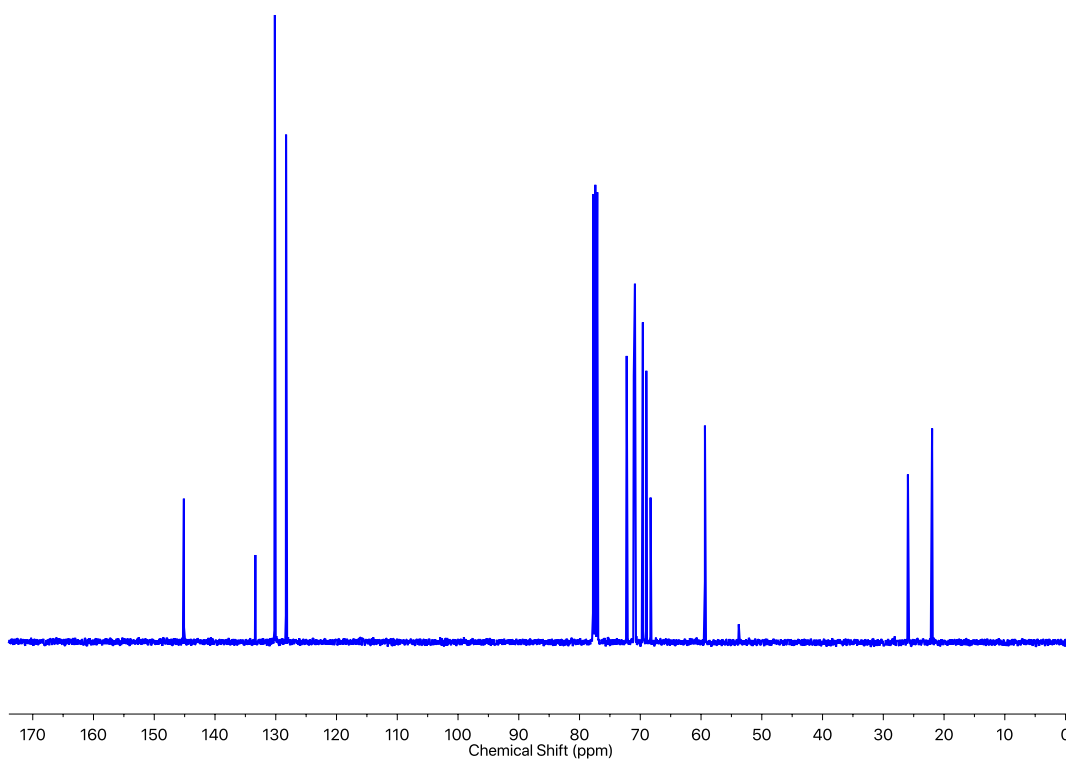

Figure S19. 1,4-dibromo-2,5-diethoxybenzene:

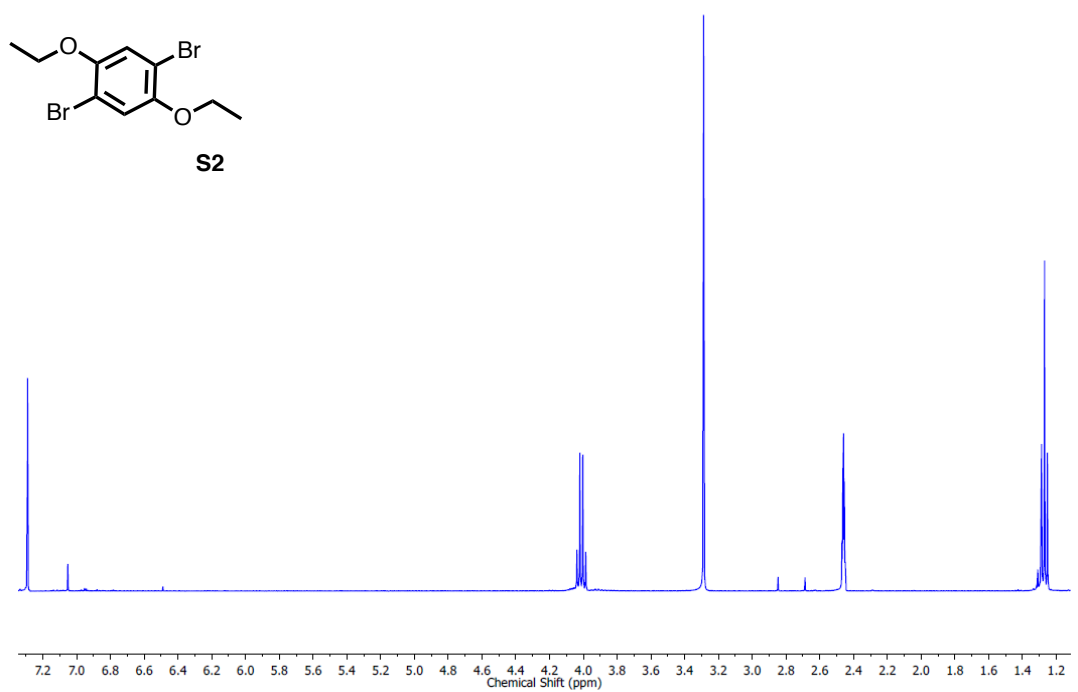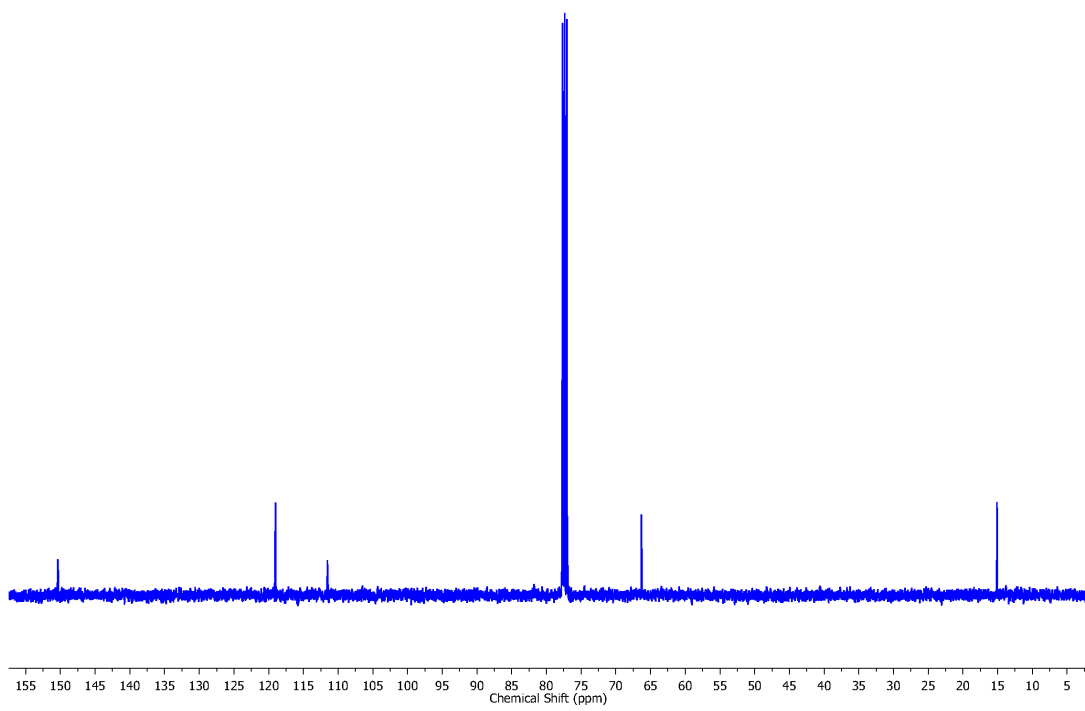

Figure S20. 1,4-dibromo-2,5-di(2-methoxyethoxy) ethylbenzene:

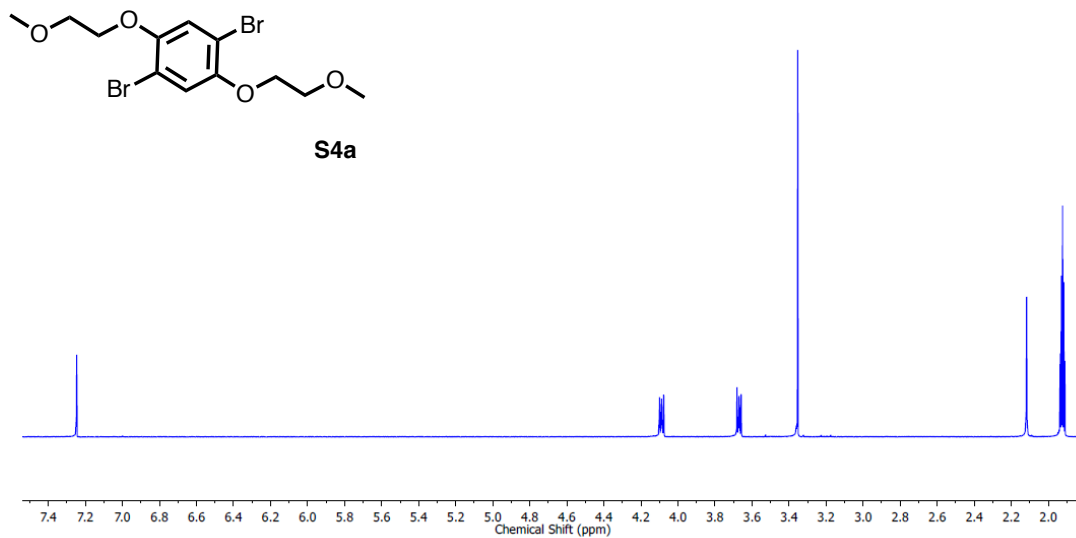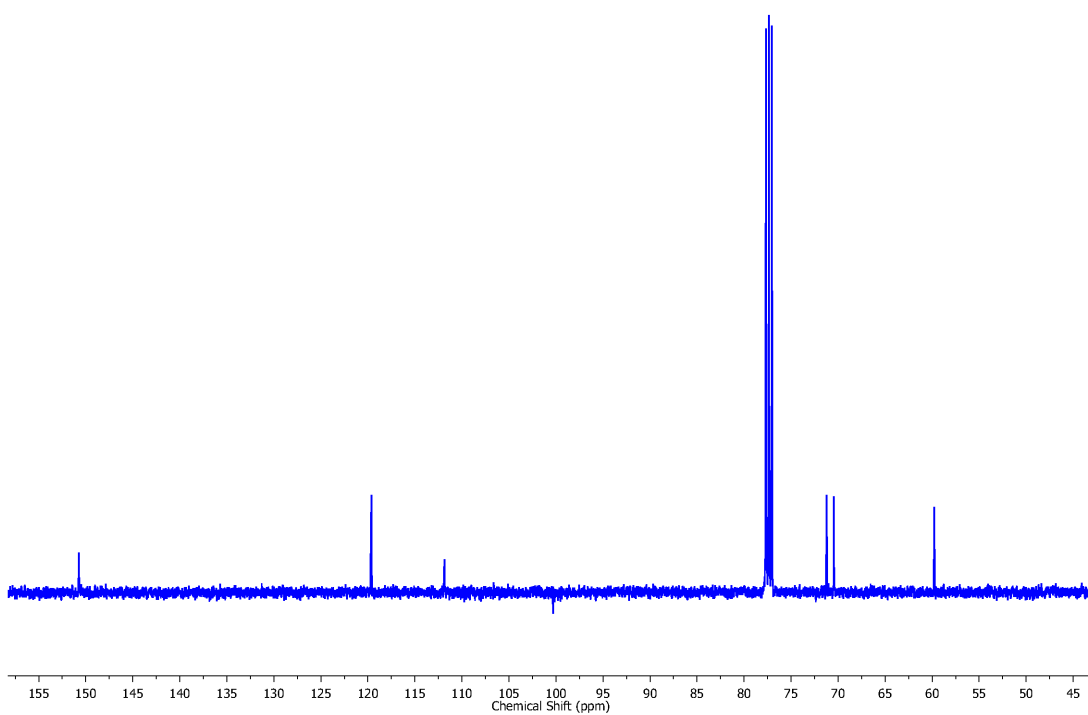

Figure S21. 1,4-dibromo-2,5-di(2-(2-methoxyethoxy)) ethylbenzene:

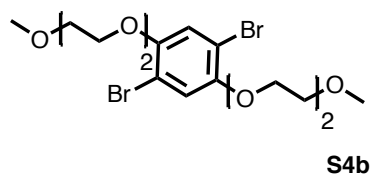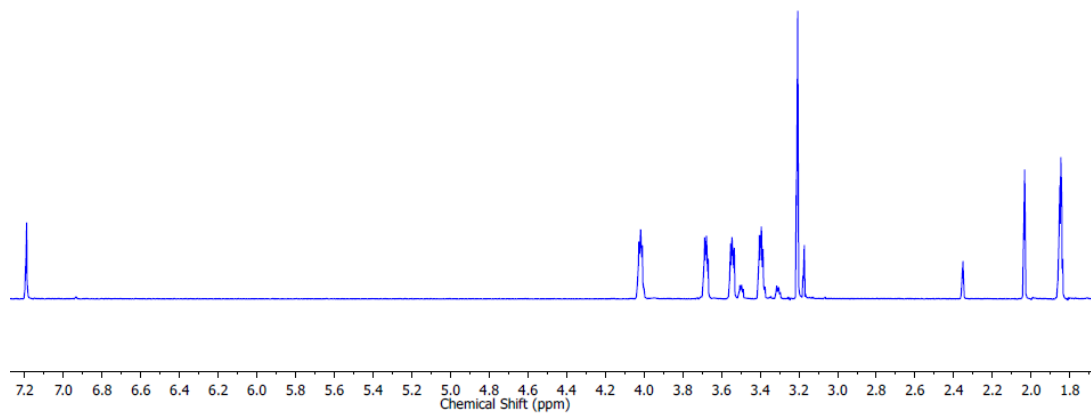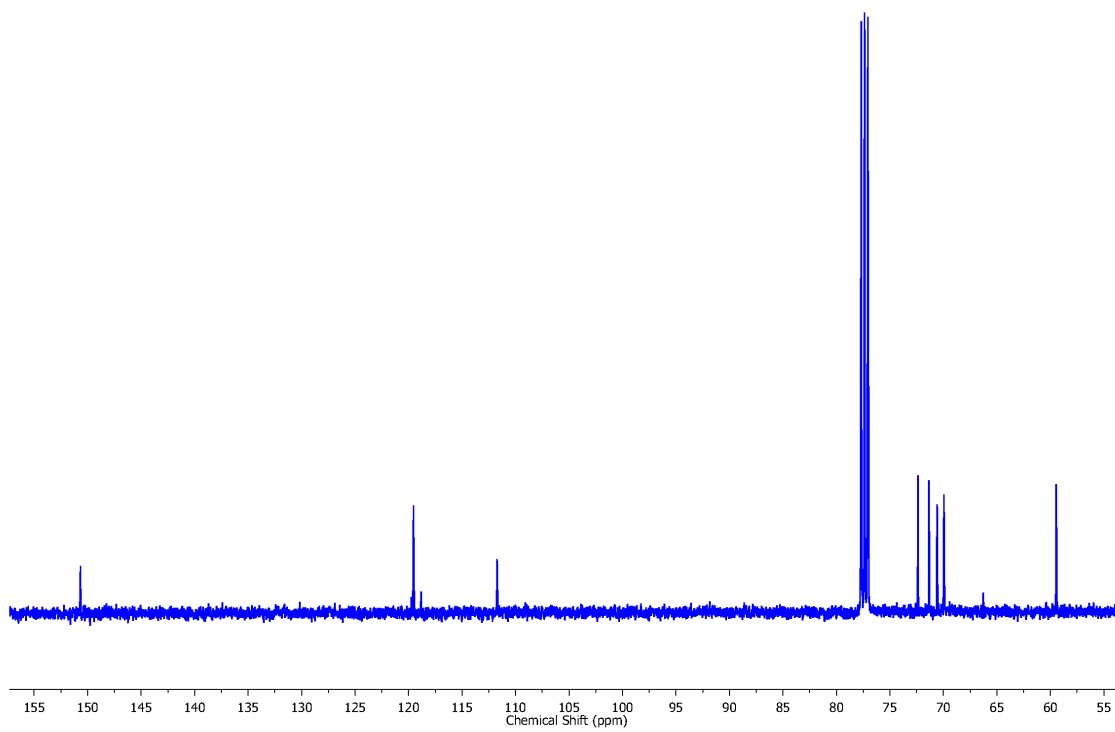



Figure S22. 1,4-dibromo-2,5-di(3-(2-methoxyethoxy)) ethylbenzene:

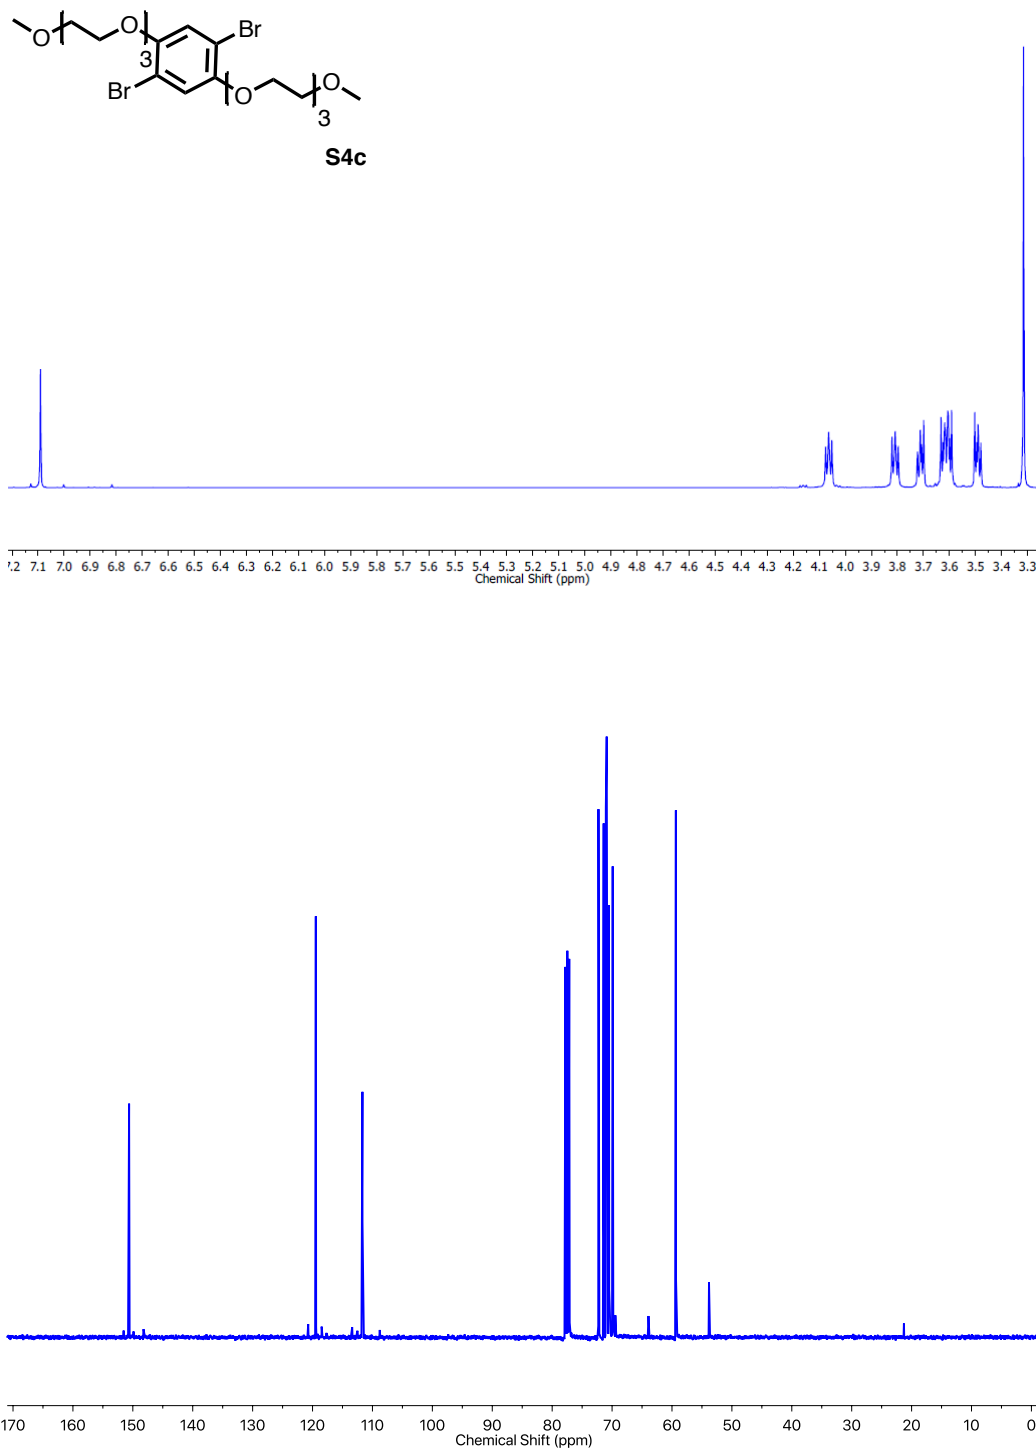

Figure S23. 4,4'-diamino-p-terphenyl:

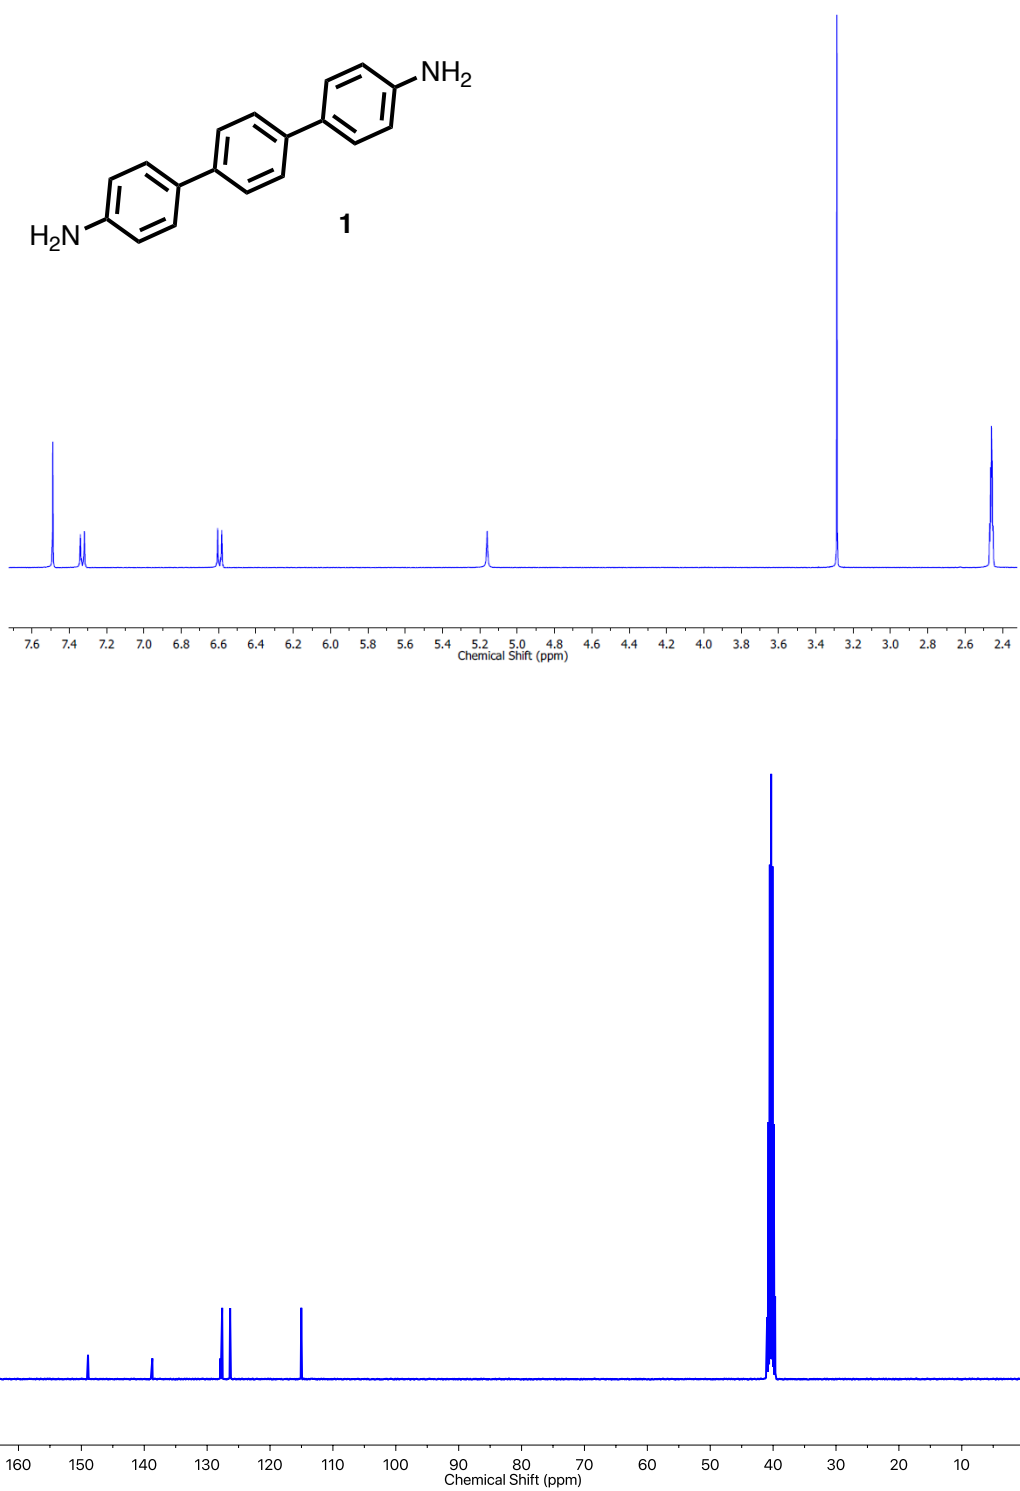

Figure S24. 1,4-diethoxy-2,5-di(p-aminophenyl)benzene:

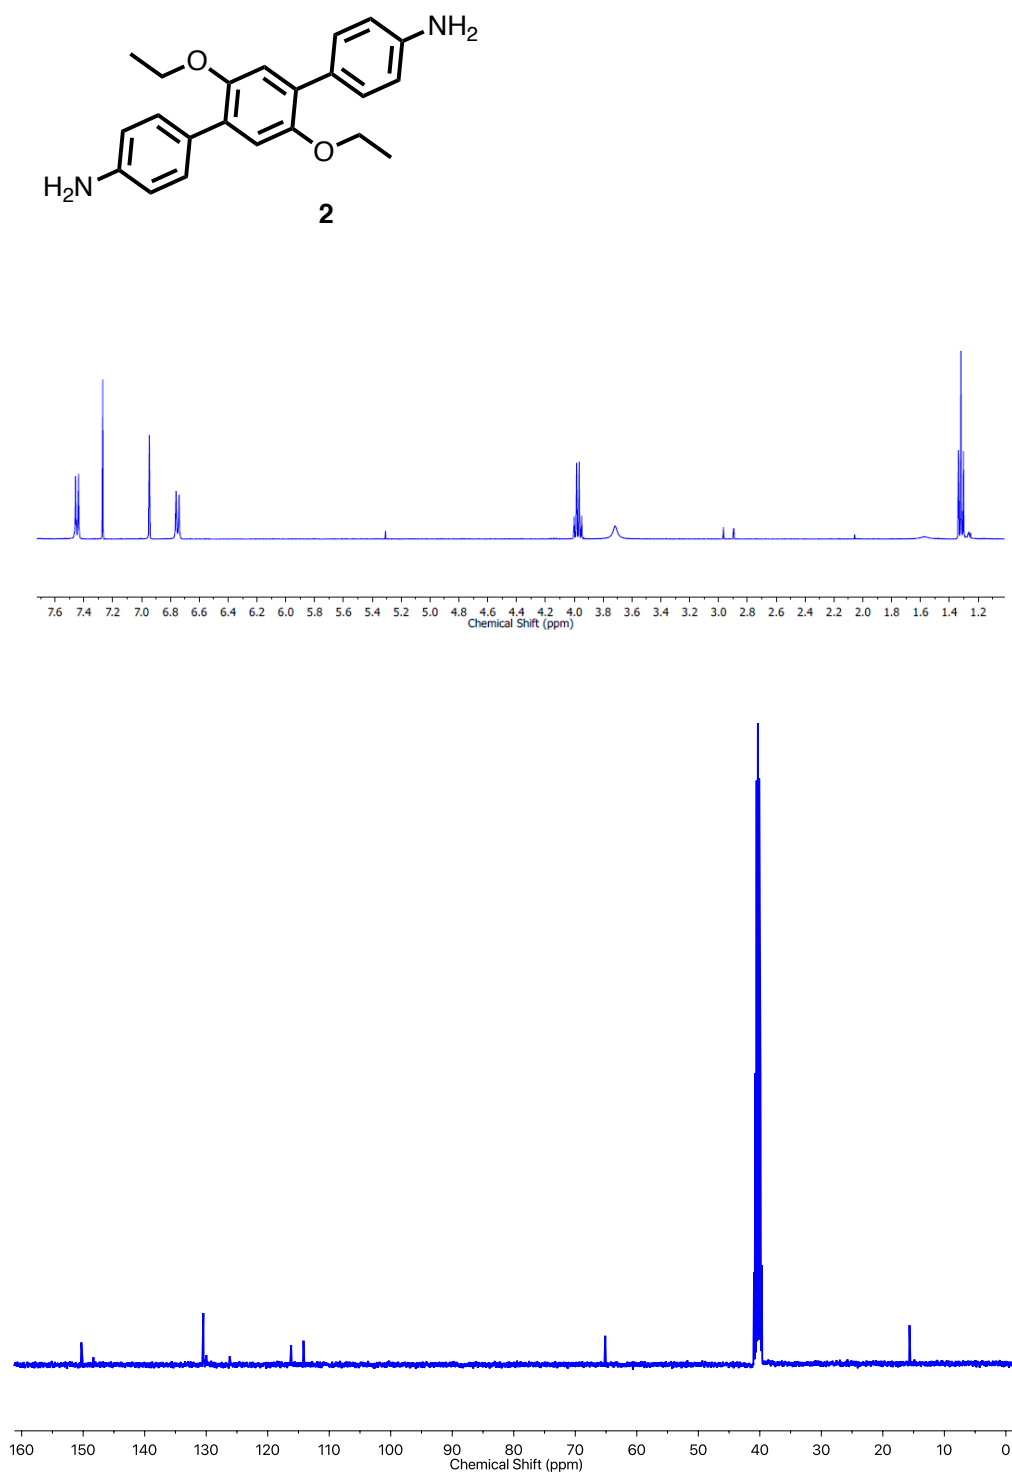

Figure S25. 1,4-di((2-methoxyethoxy)ethyl)-2,5-di(p-aminophenyl)benzene:

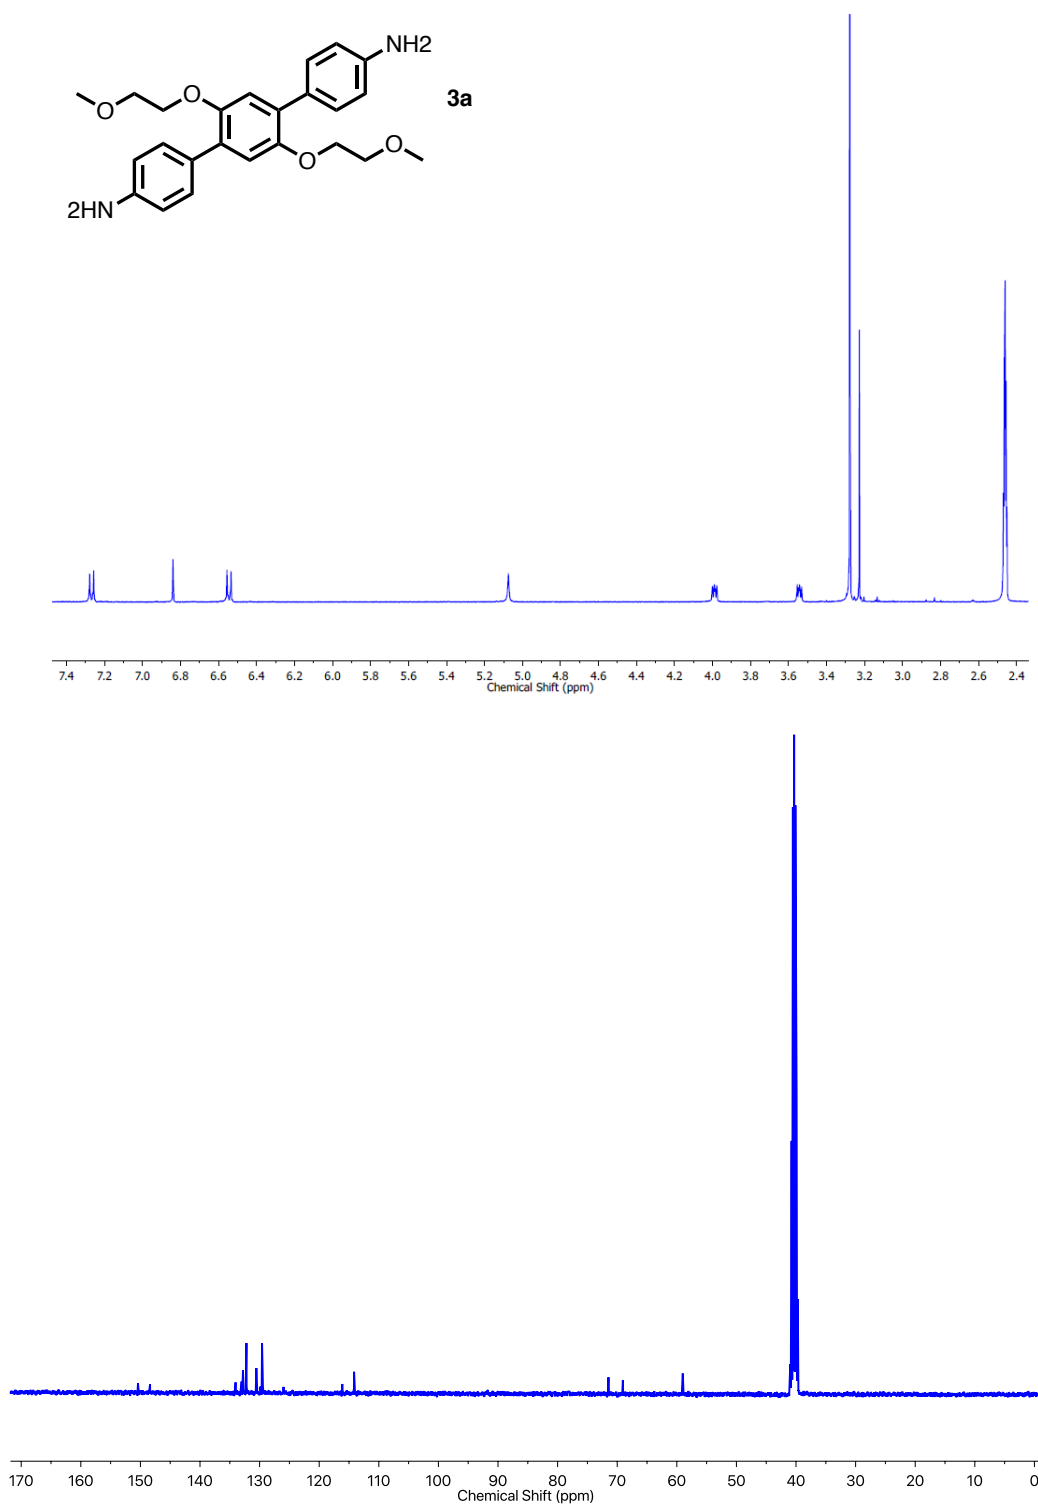

Figure S26. 1,4-di(2-(2-methoxyethoxy)ethyl)-2,5-di(p-aminophenyl)benzene:

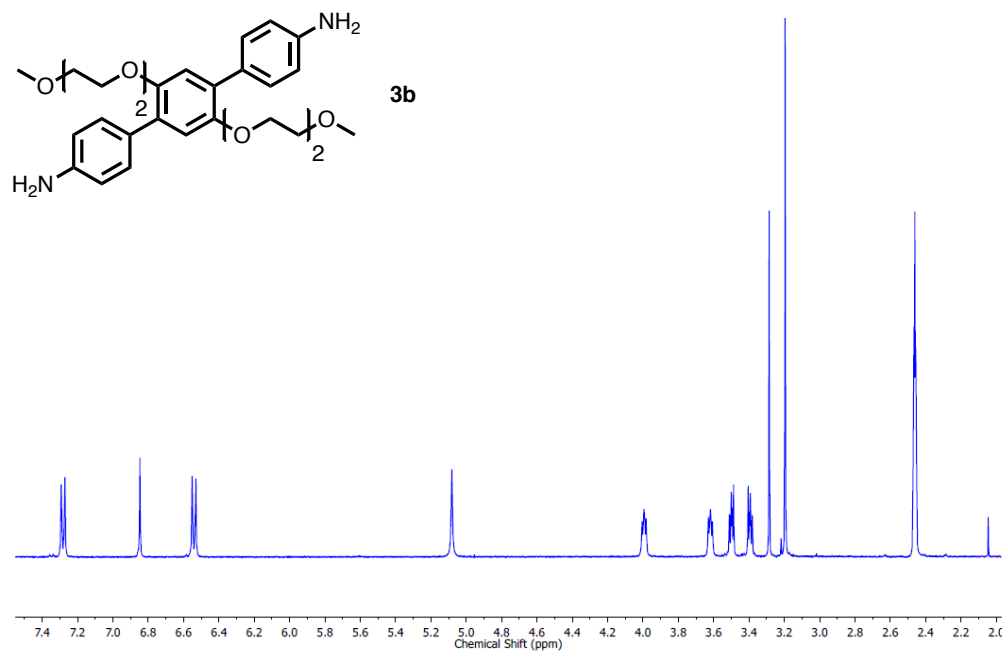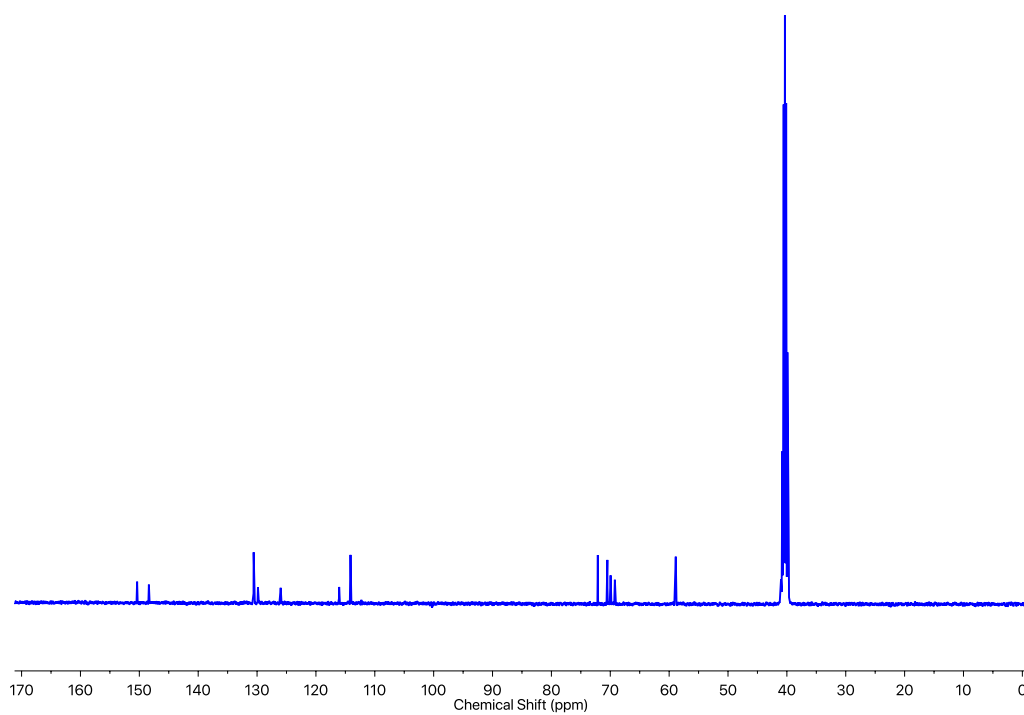

Figure S27. 1,4-di(3-(2-methoxyethoxy)ethyl)-2,5-di(*p*-aminophenyl)benzene:

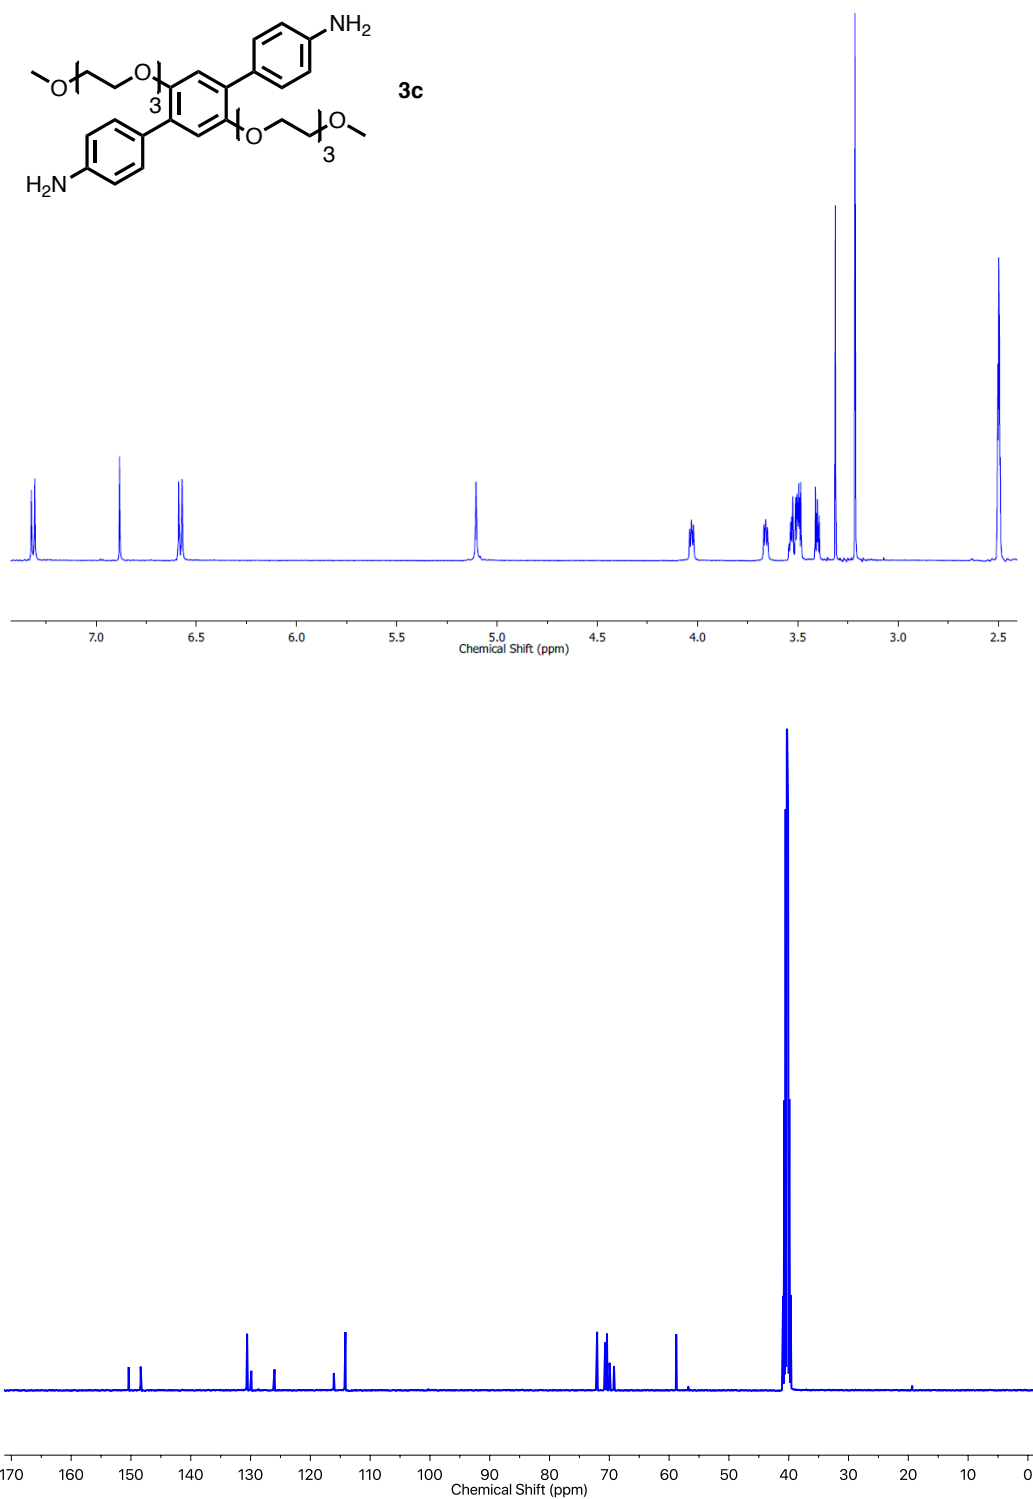

## Section S9. References

- S1 Chong, J. H.; Sauer, M.; Patrick, B. O.; Maclachlan, M. J. *Org. Lett.* **2003**, *5*, 3823-3826.
- S2 Fung, B. M.; Khitrin, A. K.; Ermolaev, K. *J. Magn. Reson.* **2000**, *142*, 97-101.
- S3 Côté, A. P.; Benin, A. I.; Ockwig, N. W.; Matzger, A. J.; O'Keeffe, M.; Yaghi, O. M. *Science* **2005**, *310*, 1166-1170.
- S4 Kandambeth, S.; Mallick, A.; Lukose, B.; Mane, M. V.; Heine, T.; Banerjee R. *J. Am. Chem. Soc.* **2012**, *134*, 19524-19527.
- S5 Materials Studio, version 8.0, BIOVIA Software Inc., San Diego, CA, 2014.
- S6 Plimpton, S. *J. Comput. Phys.* **1995**, *117*, 1-19.
- S7 Plimpton, S. J.; Pollock, R.; Stevens, M. In *Proc of the Eighth SIAM Conference on Parallel Processing for Scientific Computing Minneapolis, MN* **1997**.
- S8 Shinoda, W.; Shiga, M.; Mikami, M. *Phys. Rev. B* **2004**, *69*, 1341031-1341038.
- S9 Martyna, G. J.; Tobias, D. J.; Klein, M. L. *J. Chem. Phys.* **1994**, *101*, 4177-4189.
- S10 Parrinello, M.; Rahman, A. *J. Appl. Phys.* **1981**, *52*, 7182-7190.
- S11 Tuckerman, M. E.; Alejandre, J.; Lopez-Rendon, R.; Jochim, A. L.; Martyna, G. J. *J. Phys. a-Math. Gen.* **2006**, *39*, 5629-5651.
